# Supplementary material for: Antimicrobial Activity of Ceftazidime-Avibactam, Ceftolozane-Tazobactam, Cefiderocol, and Novel Darobactin Analogs against Multidrug-Resistant Pseudomonas aeruginosa Isolates from Pediatric and Adolescent Cystic Fibrosis Patients
Source: PubMed Central journal article supplement (PMC9927382; doi:10.1128/spectrum.04437-22), 2023-01-24
Supplement: spectrum.04437-22-s0001.pdf [file spectrum.04437-22-s0001.pdf]

1 **Antimicrobial activity of ceftazidime-avibactam, ceftolozane-tazobactam,**  
2 **cefiderocol and novel darobactin analogs against multi-drug-resistant**  
3 ***Pseudomonas aeruginosa* isolates from pediatric and adolescent cystic fibrosis**  
4 **patients**

5 Michael Marner<sup>1,2,#</sup>, Laura Kolberg<sup>3,#</sup>, Julia Horst<sup>3,4,5</sup>, Nils Böhringer<sup>2,6</sup>, Johannes  
6 Hübner<sup>3,7</sup>, Dewa M. Kresna<sup>2</sup>, Yang Liu<sup>2</sup>, Ute Mettal<sup>2</sup>, Lei Wang<sup>2</sup>, Melanie Meyer-Bühn<sup>3</sup>,  
7 Sanja Mihajlovic<sup>1</sup>, Matthias Kappler<sup>3</sup>, Till F. Schäberle<sup>1,2,6 #</sup>, Ulrich von Both<sup>3,5 #</sup>

8

9 <sup>1</sup> Fraunhofer Institute for Molecular Biology and Applied Ecology (IME), Branch for  
10 Bioresources, 35392 Giessen, Germany.

11 <sup>2</sup> Justus-Liebig-University of Giessen, 35392 Giessen, Germany.

12 <sup>3</sup> Department of Pediatrics, Dr. von Hauner Children's Hospital, University Hospital, LMU  
13 Munich, Germany.

14 <sup>4</sup> Institute for Medical Information Processing, Biometry, and Epidemiology – IBE, LMU  
15 Munich, Germany.

16 <sup>5</sup> Pettenkofer School of Public Health, Munich, Germany.

17 <sup>6</sup> German Center for Infection Research (DZIF), Partner Site Giessen-Marburg-Langen,  
18 Germany.

19 <sup>7</sup> German Center for Infection Research (DZIF), Partner Site Munich, Germany.

20

21 # Authors contributed equally

22 Correspondence:

23 Till F. Schäberle - ORCID: 0000-0001-9947-8079; Phone: +49 641 97219140; Email:  
24 [till.f.schaeberle@agrار.uni-giessen.de](mailto:till.f.schaeberle@agrار.uni-giessen.de), [till.schaeberle@ime.fraunhofer.de](mailto:till.schaeberle@ime.fraunhofer.de).

25 Ulrich von Both - ORCID: 0000-0001-8411-1071; Phone: +49 89 440052817; Email:  
26 [Ulrich.von.both@med.lmu.de](mailto:Ulrich.von.both@med.lmu.de)

27

## 28 Table of Contents

|    |                                   |                                                                                                           |          |
|----|-----------------------------------|-----------------------------------------------------------------------------------------------------------|----------|
| 29 | <b>Table S1</b>                   | Patient's demographic and clinical data                                                                   | p. 4     |
| 30 | <b>Table S2</b>                   | Strain information: ID, sampling date, resistance profile and MRGN classification                         |          |
| 31 |                                   |                                                                                                           | p. 5-6   |
| 32 | <b>Table S3</b>                   | Minimum inhibitory concentration (MIC) distribution for ceftazidime-avibactam (CZA),                      |          |
| 33 |                                   | ceftolozane-tazobactam (C/T), and cefiderocol (FDC)                                                       | p. 7     |
| 34 | <b>Table S4</b>                   | Distribution of susceptibility patterns to ceftazidime-avibactam (CZA), ceftolozane-                      |          |
| 35 |                                   | tazobactam (C/T), and cefiderocol (FDC)                                                                   | p. 8     |
| 36 | <b>Figure S1</b>                  | MS/MS fragmentation signature of darobactin B9                                                            | p. 9     |
| 37 |                                   |                                                                                                           |          |
| 38 | <b>NMR data of darobactin B9:</b> |                                                                                                           |          |
| 39 |                                   |                                                                                                           |          |
| 40 | <b>Table S5</b>                   | <sup>1</sup> H (600 MHz) and <sup>13</sup> C (150 MHz) NMR data; correlation data from HMBC, COSY, TOCSY, |          |
| 41 |                                   | and NOESY experiments                                                                                     | p. 10-11 |
| 42 | <b>Figure S2:</b>                 | Structure of darobactin B9, COSY, TOCSY, and key HMBC correlations of darobactin B9                       |          |
| 43 |                                   |                                                                                                           | p. 12    |
| 44 | <b>Figure S3</b>                  | Comparison of the <sup>1</sup> H-NMR spectra of darobactin B9 and darobactin B                            | p. 13    |
| 45 | <b>Figure S4</b>                  | Comparison of the <sup>13</sup> C-NMR spectra of darobactin B9 and darobactin B                           | p. 14    |
| 46 | <b>Figure S5</b>                  | <sup>1</sup> H-NMR spectrum of darobactin B9 (D <sub>2</sub> O, 600 MHz)                                  | p. 15    |
| 47 | <b>Figure S6</b>                  | <sup>1</sup> H-NMR spectrum of darobactin B9 (D <sub>2</sub> O, 600 MHz). Close-up in the range of 8.30 - |          |
| 48 |                                   | 6.00 ppm                                                                                                  | p. 16    |
| 49 | <b>Figure S7</b>                  | <sup>1</sup> H-NMR spectrum of darobactin B9 (D <sub>2</sub> O, 600 MHz). Close-up in the range of 4.90 - |          |
| 50 |                                   | 2.60 ppm.                                                                                                 | p. 17    |
| 51 |                                   |                                                                                                           |          |
| 52 | <b>Figure S8</b>                  | <sup>1</sup> H-NMR spectrum of darobactin B9 (D <sub>2</sub> O, 600 MHz). Close-up in the range of 2.25 – |          |
| 53 |                                   | 0.65 ppm                                                                                                  | p. 18    |
| 54 | <b>Figure S9</b>                  | <sup>1</sup> H-NMR spectrum of darobactin B9 (D <sub>2</sub> O, 700 MHz).                                 | p. 19    |
| 55 |                                   |                                                                                                           |          |
| 56 | <b>Figure S10</b>                 | <sup>1</sup> H-NMR spectrum of darobactin B9 (D <sub>2</sub> O, 700 MHz). Close-up in the range of 8.30 – |          |
| 57 |                                   | 6.10 ppm                                                                                                  | p. 20    |
| 58 |                                   |                                                                                                           |          |
| 59 | <b>Figure S11</b>                 | <sup>1</sup> H-NMR spectrum of darobactin B9 (D <sub>2</sub> O, 700 MHz). Close-up in the range of 4.90 – |          |
| 60 |                                   | 2.60 ppm.                                                                                                 | p. 21    |
| 61 |                                   |                                                                                                           |          |
| 62 | <b>Figure S12</b>                 | <sup>1</sup> H-NMR spectrum of darobactin B9 (D <sub>2</sub> O, 700 MHz). Close-up in the range of 2.30 – |          |
| 63 |                                   | 0.60 ppm.                                                                                                 | p. 22    |
| 64 |                                   |                                                                                                           |          |

|    |                   |                                                                                                                                                                                                                                                       |       |
|----|-------------------|-------------------------------------------------------------------------------------------------------------------------------------------------------------------------------------------------------------------------------------------------------|-------|
| 65 | <b>Figure S13</b> | $^{13}\text{C}$ -NMR spectrum of darobactin B9 ( $\text{D}_2\text{O}$ , 150 MHz). For the measurement 3-(trimethylsilyl)propionic-2,2,3,3- $\text{d}_4$ acid sodium salt (TSPA) was used as external standard. The multipletts indicate residual TFA. | p. 23 |
| 66 |                   |                                                                                                                                                                                                                                                       |       |
| 67 |                   |                                                                                                                                                                                                                                                       |       |
| 68 |                   |                                                                                                                                                                                                                                                       |       |
| 69 | <b>Figure S14</b> | DEPT 135 spectrum of darobactin B9 ( $\text{D}_2\text{O}$ , 150 MHz). For the measurement 3-(trimethylsilyl)propionic-2,2,3,3- $\text{d}_4$ acid sodium salt (TSPA) was used as external standard                                                     | p. 24 |
| 70 |                   |                                                                                                                                                                                                                                                       |       |
| 71 |                   |                                                                                                                                                                                                                                                       |       |
| 72 |                   |                                                                                                                                                                                                                                                       |       |
| 73 | <b>Figure S15</b> | COSY spectrum of darobactin B9 ( $\text{D}_2\text{O}$ , 600 MHz)                                                                                                                                                                                      | p. 25 |
| 74 |                   |                                                                                                                                                                                                                                                       |       |
| 75 | <b>Figure S16</b> | COSY spectrum of darobactin B9 ( $\text{D}_2\text{O}$ , 700 MHz), measured with $\text{H}_2\text{O}$ suppression.                                                                                                                                     | p. 26 |
| 76 |                   |                                                                                                                                                                                                                                                       |       |
| 77 |                   |                                                                                                                                                                                                                                                       |       |
| 78 | <b>Figure S17</b> | TOCSY spectrum of darobactin B9 ( $\text{D}_2\text{O}$ , 700 MHz), measured with $\text{H}_2\text{O}$ suppression                                                                                                                                     | p. 27 |
| 79 |                   |                                                                                                                                                                                                                                                       |       |
| 80 | <b>Figure S18</b> | NOESY spectrum of darobactin B9 ( $\text{D}_2\text{O}$ , 700 MHz), measured with $\text{H}_2\text{O}$ suppression.                                                                                                                                    | p. 28 |
| 81 |                   |                                                                                                                                                                                                                                                       |       |
| 82 | <b>Figure S19</b> | HSQC spectrum of darobactin B9 ( $\text{D}_2\text{O}$ , 600 MHz)                                                                                                                                                                                      | p. 29 |
| 83 |                   |                                                                                                                                                                                                                                                       |       |
| 84 | <b>Figure S20</b> | HSQC spectrum of darobactin B9 ( $\text{D}_2\text{O}$ , 600 MHz), measured with non-uniform sampling.                                                                                                                                                 | p. 30 |
| 85 |                   |                                                                                                                                                                                                                                                       |       |
| 86 |                   |                                                                                                                                                                                                                                                       |       |
| 87 | <b>Figure S21</b> | HMBC spectrum of darobactin B9 ( $\text{D}_2\text{O}$ , 600 MHz)                                                                                                                                                                                      | p. 31 |
| 88 |                   |                                                                                                                                                                                                                                                       |       |
| 89 | <b>Figure S22</b> | HMBC spectrum of darobactin B9 ( $\text{D}_2\text{O}$ , 600 MHz), measured with non-uniform sampling.                                                                                                                                                 | p. 32 |
| 90 |                   |                                                                                                                                                                                                                                                       |       |
| 91 |                   |                                                                                                                                                                                                                                                       |       |
| 92 |                   |                                                                                                                                                                                                                                                       |       |

93

94 **Table S1.** Demographic and clinical data collected on each of 35 patients

| <b>Patient Number</b> | <b>Sex</b> | <b>Number of <i>P. aeruginosa</i> isolates collected</b> | <b>Homozygosity or heterozygosity for the delta F508 mutation</b> | <b>Age in years at first <i>P. aeruginosa</i> detection</b> | <b>Age in years at first MRGN <i>P. aeruginosa</i> detection</b> |
|-----------------------|------------|----------------------------------------------------------|-------------------------------------------------------------------|-------------------------------------------------------------|------------------------------------------------------------------|
| Pat01                 | female     | 1                                                        | other mutation                                                    | unknown                                                     | unknown                                                          |
| Pat02                 | male       | 2                                                        | heterozygote                                                      | 7                                                           | unknown                                                          |
| Pat03                 | male       | 4                                                        | heterozygote                                                      | 14                                                          | unknown                                                          |
| Pat04                 | female     | 1                                                        | homozygote                                                        | 5                                                           | unknown                                                          |
| Pat05                 | male       | 3                                                        | heterozygote                                                      | 11                                                          | 11                                                               |
| Pat06                 | male       | 1                                                        | other mutation                                                    | 16                                                          | 18                                                               |
| Pat07                 | male       | 2                                                        | heterozygote                                                      | 2                                                           | 2                                                                |
| Pat08                 | female     | 1                                                        | unknown                                                           | unknown                                                     | unknown                                                          |
| Pat09                 | female     | 1                                                        | homozygote                                                        | 14                                                          | unknown                                                          |
| Pat10                 | female     | 4                                                        | heterozygote                                                      | 6                                                           | unknown                                                          |
| Pat11                 | female     | 2                                                        | homozygote                                                        | 22                                                          | unknown                                                          |
| Pat12                 | male       | 4                                                        | other mutation                                                    | 17                                                          | 17                                                               |
| Pat13                 | male       | 1                                                        | homozygote                                                        | 6                                                           | 9                                                                |
| Pat14                 | female     | 1                                                        | other mutation                                                    | 10                                                          | unknown                                                          |
| Pat15                 | female     | 1                                                        | unknown                                                           | unknown                                                     | unknown                                                          |
| Pat16                 | female     | 8                                                        | heterozygote                                                      | 6                                                           | unknown                                                          |
| Pat17                 | male       | 7                                                        | heterozygote                                                      | 0                                                           | unknown                                                          |
| Pat18                 | female     | 1                                                        | homozygote                                                        | 7                                                           | 11                                                               |
| Pat19                 | female     | 1                                                        | homozygote                                                        | 16                                                          | unknown                                                          |
| Pat20                 | female     | 1                                                        | homozygote                                                        | 16                                                          | unknown                                                          |
| Pat21                 | male       | 2                                                        | unknown                                                           | unknown                                                     | unknown                                                          |
| Pat22                 | female     | 1                                                        | homozygote                                                        | 1                                                           | unknown                                                          |
| Pat23                 | female     | 2                                                        | homozygote                                                        | 8                                                           | unknown                                                          |
| Pat24                 | male       | 4                                                        | heterozygote                                                      | 12                                                          | unknown                                                          |
| Pat25                 | female     | 1                                                        | homozygote                                                        | 18                                                          | 18                                                               |
| Pat26                 | male       | 2                                                        | homozygote                                                        | unknown                                                     | unknown                                                          |
| Pat27                 | female     | 2                                                        | other mutation                                                    | 7                                                           | unknown                                                          |
| Pat28                 | male       | 1                                                        | homozygote                                                        | 3                                                           | unknown                                                          |
| Pat29                 | female     | 1                                                        | other mutation                                                    | 10                                                          | unknown                                                          |
| Pat30                 | male       | 1                                                        | homozygote                                                        | 9                                                           | unknown                                                          |
| Pat31                 | female     | 1                                                        | other mutation                                                    | 8                                                           | unknown                                                          |
| Pat32                 | female     | 1                                                        | homozygote                                                        | 0                                                           | unknown                                                          |
| Pat33                 | male       | 1                                                        | homozygote                                                        | 2                                                           | unknown                                                          |
| Pat34                 | female     | 2                                                        | homozygote                                                        | 13                                                          | 13                                                               |
| Pat35                 | female     | 1                                                        | heterozygote                                                      | 5                                                           | unknown                                                          |

95

96 **Table S2.** Comparison between original and new resistance profile and the resulting MRGN<sup>a</sup> classification for each isolate included in the  
 97 analysis

| MRGN-isolate | Patient-ID | Genbank accession number | Sampling date | Original MRGN classification | Original resistance profile |      |     |      |     |     |      |     |     | new MRGN classification |     |     |     |     |     |     |      |      |
|--------------|------------|--------------------------|---------------|------------------------------|-----------------------------|------|-----|------|-----|-----|------|-----|-----|-------------------------|-----|-----|-----|-----|-----|-----|------|------|
|              |            |                          |               |                              | TZP                         | PIP  | CAZ | FEP  | CIP | MEM | IPM  | TOB | CST |                         | PIP | CAZ | FEP | CIP | MEM | IPM | TOB  | CST  |
| Isolate 1    | Pat01      | OP737540                 | 15.09.2006    | 3-MRGN                       | R                           | n.a. | R   | n.a. | I   | R   | n.a. | S   | S   | 4-MRGN                  | R   | R   | R   | R   | R   | R   | S    | S    |
| Isolate 2    | Pat02      | OP737541                 | 10.05.2007    | 3-MRGN                       | R                           | n.a. | R   | n.a. | S   | R   | n.a. | R   | S   | 4-MRGN                  | R   | R   | R   | R   | R   | R   | n.a. | n.a. |
| Isolate 3    | Pat02      | OP737542                 | 10.05.2007    | 3-MRGN                       | R                           | n.a. | R   | n.a. | S   | R   | n.a. | R   | S   | 4-MRGN                  | R   | R   | R   | R   | R   | R   | n.a. | n.a. |
| Isolate 4    | Pat03      | OP737543                 | 28.09.2006    | 3-MRGN                       | R                           | n.a. | R   | n.a. | S   | R   | n.a. | R   | S   | 4-MRGN                  | R   | R   | R   | R   | R   | R   | n.a. | n.a. |
| Isolate 5    | Pat03      | OP737544                 | 28.09.2006    | 3-MRGN                       | R                           | n.a. | R   | n.a. | I   | R   | n.a. | S   | S   | 4-MRGN                  | R   | R   | R   | R   | R   | R   | n.a. | n.a. |
| Isolate 6    | Pat03      | OP737545                 | 06.03.2007    | 3-MRGN                       | R                           | n.a. | R   | n.a. | S   | R   | n.a. | S   | S   | 4-MRGN                  | R   | R   | R   | R   | R   | R   | R    | S    |
| Isolate 7    | Pat03      | OP737546                 | 28.09.2006    | 3-MRGN                       | R                           | n.a. | R   | n.a. | S   | R   | n.a. | S   | S   | 4-MRGN                  | R   | R   | R   | R   | R   | R   | S    | S    |
| Isolate 8    | Pat04      | OP737547                 | 17.10.2006    | 3-MRGN                       | S                           | n.a. | R   | n.a. | R   | R   | n.a. | R   | S   | non-MRGN                | I   | I   | I   | R   | I   | R   | R    | S    |
| Isolate 9    | Pat05      | OP737548                 | 08.09.2008    | 3-MRGN                       | R                           | n.a. | R   | n.a. | S   | R   | n.a. | S   | S   | 4-MRGN                  | R   | R   | R   | R   | R   | R   | n.a. | n.a. |
| Isolate 10   | Pat05      | OP737549                 | 01.10.2008    | 3-MRGN                       | R                           | n.a. | R   | n.a. | S   | R   | n.a. | S   | S   | 3-MRGN                  | R   | R   | R   | R   | I   | R   | S    | S    |
| Isolate 11   | Pat05      | OP737550                 | 10.11.2008    | 3-MRGN                       | R                           | n.a. | R   | n.a. | S   | R   | n.a. | S   | S   | 4-MRGN                  | R   | R   | R   | R   | R   | R   | S    | S    |
| Isolate 12   | Pat06      | OP737551                 | 23.12.2008    | 3-MRGN                       | R                           | n.a. | R   | n.a. | S   | R   | n.a. | R   | S   | non-MRGN                | I   | I   | R   | I   | S   | I   | n.a. | n.a. |
| Isolate 13   | Pat07      | OP737552                 | 10.06.2010    | 4-MRGN                       | R                           | n.a. | R   | n.a. | R   | R   | n.a. | S   | S   | 4-MRGN                  | R   | R   | R   | R   | R   | R   | R    | n.a. |
| Isolate 14   | Pat07      | OP737553                 | 21.12.2011    | 3-MRGN                       | R                           | n.a. | R   | n.a. | R   | S   | n.a. | S   | R   | non-MRGN                | R   | I   | I   | R   | S   | I   | S    | S    |
| Isolate 15   | Pat08      | OP737554                 | 19.11.2010    | 4-MRGN                       | R                           | n.a. | R   | n.a. | R   | R   | n.a. | R   | S   | 4-MRGN                  | R   | R   | R   | R   | R   | R   | n.a. | n.a. |
| Isolate 16   | Pat09      | OP737555                 | 31.05.2007    | 3-MRGN                       | R                           | n.a. | R   | n.a. | S   | R   | n.a. | S   | S   | 4-MRGN                  | R   | R   | R   | R   | R   | R   | S    | S    |
| Isolate 17   | Pat10      | OP737556                 | 29.08.2013    | 3-MRGN                       | R                           | n.a. | R   | n.a. | I   | R   | n.a. | R   | S   | 4-MRGN                  | R   | R   | R   | R   | R   | R   | n.a. | n.a. |
| Isolate 18   | Pat10      | OP737557                 | 12.10.2006    | 4-MRGN                       | R                           | n.a. | R   | n.a. | R   | R   | n.a. | R   | S   | 4-MRGN                  | R   | R   | R   | R   | R   | R   | n.a. | n.a. |
| Isolate 19   | Pat10      | OP737558                 | 29.08.2013    | 4-MRGN                       | R                           | n.a. | R   | n.a. | R   | R   | n.a. | R   | S   | 4-MRGN                  | R   | R   | R   | R   | R   | R   | n.a. | n.a. |
| Isolate 20   | Pat10      | OP737559                 | 24.05.2007    | 3-MRGN                       | R                           | n.a. | R   | n.a. | S   | R   | n.a. | R   | S   | 4-MRGN                  | R   | R   | R   | R   | R   | R   | n.a. | n.a. |
| Isolate 21   | Pat11      | OP737560                 | 09.11.2006    | 3-MRGN                       | R                           | n.a. | R   | n.a. | S   | R   | n.a. | S   | S   | 4-MRGN                  | R   | R   | R   | R   | R   | R   | n.a. | n.a. |
| Isolate 22   | Pat11      | OP737561                 | 02.02.2007    | 3-MRGN                       | R                           | n.a. | R   | n.a. | I   | R   | n.a. | S   | S   | 4-MRGN                  | R   | R   | R   | R   | R   | R   | S    | S    |
| Isolate 23   | Pat12      | OP737562                 | 16.04.2008    | 3-MRGN                       | R                           | n.a. | R   | n.a. | S   | R   | n.a. | R   | S   | 4-MRGN                  | R   | R   | R   | R   | R   | R   | n.a. | S    |
| Isolate 24   | Pat12      | OP737563                 | 25.03.2008    | 3-MRGN                       | R                           | n.a. | R   | n.a. | S   | R   | n.a. | R   | S   | 3-MRGN                  | R   | R   | R   | I   | R   | R   | R    | S    |
| Isolate 25   | Pat12      | OP737564                 | 16.04.2008    | 3-MRGN                       | R                           | n.a. | R   | n.a. | S   | R   | n.a. | R   | S   | 3-MRGN                  | R   | R   | R   | I   | R   | R   | R    | S    |
| Isolate 26   | Pat12      | OP737565                 | 04.03.2009    | 3-MRGN                       | R                           | n.a. | R   | n.a. | S   | R   | n.a. | I   | S   | 4-MRGN                  | R   | R   | R   | R   | R   | R   | R    | S    |
| Isolate 27   | Pat13      | OP737566                 | 22.09.2017    | 4-MRGN                       | R                           | R    | R   | R    | R   | R   | n.a. | S   | S   | non-MRGN                | I   | I   | I   | R   | S   | I   | S    | S    |
| Isolate 28   | Pat14      | OP737567                 | 17.10.2018    | 3-MRGN                       | R                           | R    | R   | R    | R   | S   | S    | S   | S   | non-MRGN                | R   | R   | R   | I   | S   | I   | S    | S    |
| Isolate 29   | Pat15      | OP737568                 | 25.07.2007    | 3-MRGN                       | R                           | n.a. | R   | n.a. | S   | R   | n.a. | S   | S   | 3-MRGN                  | R   | R   | R   | I   | R   | R   | S    | S    |
| Isolate 30   | Pat16      | OP737569                 | 25.03.2010    | 4-MRGN                       | R                           | n.a. | R   | n.a. | R   | R   | n.a. | R   | S   | 4-MRGN                  | R   | R   | R   | R   | R   | R   | R    | S    |
| Isolate 31   | Pat16      | OP737570                 | 16.04.2009    | 3-MRGN                       | R                           | n.a. | R   | n.a. | S   | R   | n.a. | S   | S   | 4-MRGN                  | R   | R   | R   | R   | R   | R   | S    | S    |
| Isolate 32   | Pat16      | OP737571                 | 26.10.2010    | 3-MRGN                       | R                           | n.a. | R   | n.a. | I   | R   | n.a. | S   | S   | 4-MRGN                  | R   | R   | R   | R   | R   | R   | S    | S    |
| Isolate 33   | Pat16      | OP737572                 | 19.12.2007    | 4-MRGN                       | R                           | n.a. | R   | n.a. | R   | R   | n.a. | S   | S   | 4-MRGN                  | R   | R   | R   | R   | R   | R   | S    | S    |
| Isolate 34   | Pat16      | OP737573                 | 01.07.2009    | 4-MRGN                       | R                           | n.a. | R   | n.a. | R   | R   | n.a. | S   | S   | 4-MRGN                  | R   | R   | R   | R   | R   | R   | S    | S    |
| Isolate 35   | Pat16      | OP737574                 | 14.01.2010    | 4-MRGN                       | R                           | n.a. | R   | n.a. | R   | R   | n.a. | S   | S   | 4-MRGN                  | R   | R   | R   | R   | R   | R   | S    | S    |
| Isolate 36   | Pat16      | OP737575                 | 12.05.2010    | 4-MRGN                       | R                           | n.a. | R   | n.a. | R   | R   | n.a. | S   | S   | 4-MRGN                  | R   | R   | R   | R   | R   | R   | S    | S    |
| Isolate 37   | Pat17      | OP737576                 | 10.04.2013    | 4-MRGN                       | R                           | n.a. | R   | n.a. | R   | R   | n.a. | S   | S   | 4-MRGN                  | R   | R   | R   | R   | R   | R   | n.a. | n.a. |
| Isolate 38   | Pat17      | OP737577                 | 10.08.2016    | 3-MRGN                       | R                           | n.a. | R   | R    | R   | S   | n.a. | S   | S   | non-MRGN                | R   | I   | I   | R   | I   | I   | R    | S    |
| Isolate 39   | Pat17      | OP737578                 | 08.09.2016    | 3-MRGN                       | R                           | n.a. | R   | S    | R   | R   | n.a. | S   | S   | non-MRGN                | R   | R   | I   | R   | I   | I   | R    | S    |

|            |       |          |            |        |   |      |   |      |   |   |      |   |   |          |   |   |   |   |   |   |      |      |
|------------|-------|----------|------------|--------|---|------|---|------|---|---|------|---|---|----------|---|---|---|---|---|---|------|------|
| Isolate 40 | Pat17 | OP737579 | 08.03.2018 | 3-MRGN | R | R    | R | R    | R | I | S    | S | S | non-MRGN | R | I | I | R | I | I | S    | S    |
| Isolate 41 | Pat17 | OP737580 | 28.06.2017 | 3-MRGN | S | R    | R | R    | R | S | n.a. | S | S | non-MRGN | R | I | I | R | I | I | S    | S    |
| Isolate 42 | Pat17 | OP737581 | 28.06.2017 | 3-MRGN | R | R    | R | S    | R | R | n.a. | S | S | 3-MRGN   | R | R | R | R | I | I | S    | S    |
| Isolate 43 | Pat17 | OP737582 | 08.03.2018 | 3-MRGN | R | R    | R | S    | R | R | R    | S | S | 4-MRGN   | R | R | R | R | R | R | S    | S    |
| Isolate 44 | Pat18 | OP737583 | 25.03.2009 | 3-MRGN | R | n.a. | R | n.a. | I | R | n.a. | S | S | non-MRGN | I | I | I | I | S | I | S    | S    |
| Isolate 45 | Pat19 | OP737584 | 20.09.2006 | 3-MRGN | R | n.a. | R | n.a. | S | R | n.a. | S | S | 4-MRGN   | R | R | R | R | R | R | n.a. | n.a. |
| Isolate 46 | Pat20 | OP737585 | 07.03.2007 | 3-MRGN | R | n.a. | R | n.a. | S | R | n.a. | S | S | 4-MRGN   | R | R | R | R | R | R | S    | S    |
| Isolate 47 | Pat21 | OP737586 | 24.10.2017 | 3-MRGN | R | R    | R | R    | S | R | n.a. | S | S | non-MRGN | I | I | I | I | S | I | S    | S    |
| Isolate 48 | Pat21 | OP737587 | 07.03.2017 | 3-MRGN | R | R    | R | R    | S | R | n.a. | S | S | 3-MRGN   | R | R | R | R | S | I | S    | S    |
| Isolate 49 | Pat22 | OP737588 | 07.02.2007 | 4-MRGN | R | n.a. | R | n.a. | R | R | n.a. | S | S | 4-MRGN   | R | R | R | R | R | R | S    | S    |
| Isolate 50 | Pat23 | OP737589 | 29.01.2014 | 3-MRGN | R | R    | S | R    | R | R | n.a. | R | S | 4-MRGN   | R | R | R | R | R | R | R    | S    |
| Isolate 51 | Pat23 | OP737590 | 29.01.2014 | 4-MRGN | R | R    | R | R    | R | R | n.a. | R | S | 4-MRGN   | R | R | R | R | R | R | R    | S    |
| Isolate 52 | Pat24 | OP737591 | 15.03.2007 | 4-MRGN | R | n.a. | R | n.a. | R | R | n.a. | I | S | 4-MRGN   | R | R | R | R | R | R | n.a. | n.a. |
| Isolate 53 | Pat24 | OP737592 | 31.08.2006 | 3-MRGN | R | n.a. | R | n.a. | I | R | n.a. | R | S | non-MRGN | R | I | I | R | I | R | R    | S    |
| Isolate 54 | Pat25 | OP737593 | 15.02.2007 | 3-MRGN | R | n.a. | R | n.a. | S | R | n.a. | S | S | 3-MRGN   | R | R | R | I | R | R | S    | S    |
| Isolate 55 | Pat26 | OP737594 | 31.03.2017 | 3-MRGN | R | R    | R | R    | R | I | n.a. | R | S | non-MRGN | I | I | R | I | S | I | S    | S    |
| Isolate 56 | Pat26 | OP737595 | 26.05.2017 | 3-MRGN | R | R    | R | R    | R | S | n.a. | S | S | non-MRGN | I | R | R | R | S | R | S    | S    |
| Isolate 57 | Pat27 | OP737596 | 04.04.2007 | 3-MRGN | R | n.a. | R | n.a. | R | S | n.a. | S | S | 3-MRGN   | R | R | R | R | I | R | S    | S    |
| Isolate 58 | Pat28 | OP737597 | 07.09.2006 | 3-MRGN | R | n.a. | S | n.a. | R | R | n.a. | R | S | non-MRGN | R | I | I | R | I | I | R    | S    |
| Isolate 59 | Pat29 | OP737598 | 15.11.2006 | 3-MRGN | R | n.a. | R | n.a. | S | R | n.a. | R | S | non-MRGN | R | R | R | I | S | I | R    | S    |
| Isolate 60 | Pat30 | OP737599 | 01.09.2006 | 3-MRGN | R | n.a. | R | n.a. | I | R | n.a. | S | S | 4-MRGN   | R | R | R | R | R | R | R    | S    |
| Isolate 61 | Pat31 | OP737600 | 08.09.2006 | 3-MRGN | R | n.a. | R | n.a. | I | R | n.a. | S | S | 3-MRGN   | R | R | R | R | I | R | R    | S    |
| Isolate 62 | Pat32 | OP737601 | 30.04.2015 | 3-MRGN | R | n.a. | S | n.a. | R | R | n.a. | S | S | 4-MRGN   | R | R | R | R | R | R | S    | S    |
| Isolate 63 | Pat33 | OP737602 | 11.02.2013 | 3-MRGN | R | n.a. | R | n.a. | S | R | n.a. | S | S | 4-MRGN   | R | R | R | R | R | R | n.a. | n.a. |
| Isolate 64 | Pat34 | OP737603 | 02.11.2018 | 3-MRGN | S | R    | R | R    | R | S | S    | R | S | non-MRGN | R | R | I | R | S | I | R    | S    |
| Isolate 65 | Pat34 | OP737604 | 14.06.2017 | 3-MRGN | R | R    | R | R    | R | I | R    | R | S | 3-MRGN   | R | R | R | R | S | I | R    | S    |
| Isolate 66 | Pat35 | OP737605 | 05.02.2007 | 3-MRGN | R | n.a. | R | n.a. | R | S | n.a. | R | S | non-MRGN | R | I | R | R | S | R | R    | S    |

TZP: piperacillin-tazobactam, PIP: piperacillin, CAZ: ceftazidime, FEP: Cefepime, CIP: Ciprofloxacin, MEM: Meropenem, IPM: Imipenem, TOB: Tobramycin, CST: Colistin, n.a.: not available  
<sup>a</sup>MRGN (multidrug-resistant gramnegative bacteria) is classified according to KRINKO as unsusceptible to the lead compounds of 3 (3-MRGN) or 4 (4-MRGN) of the following antibiotic classes: acylureidopenicillins (piperacillin-tazobactam or piperacillin), third- or fourth-generation cephalosporins (ceftazidime and cefepime), fluoroquinolones (ciprofloxacin) and carbapenems (meropenem and imipenem).

99 **Table S3.** Minimum inhibitory concentration (MIC) distribution for ceftazidime-avibactam (CZA),  
 100 ceftolozane-tazobactam (C/T), and cefiderocol (FDC) for 66 *Pseudomonas aeruginosa* isolates.  
 101 Breakpoints determined by European Committee on Antimicrobial Susceptibility Testing (EUCAST) are  
 102 used to define bacterial isolates as resistant or susceptible.

| Antimicrobial Agent            | Number of Isolates with indicated MIC (µg/mL) |          |         |         |         |           |           |      | MIC50 (µg/mL) | MIC90 (µg/mL) | classification category according to EUCAST criteria |           |
|--------------------------------|-----------------------------------------------|----------|---------|---------|---------|-----------|-----------|------|---------------|---------------|------------------------------------------------------|-----------|
|                                | ≤ 0.25                                        | 0.38-1.0 | 1.5-2.0 | 3.0-4.0 | 6.0-8.0 | 12.0-16.0 | 24.0-64.0 | >96  |               |               | Susceptible                                          | Resistant |
| CZA                            | 0                                             | 0        | 4       | 16      | 11      | 8         | 12        | 15   | 12            | 256           | 31                                                   | 35        |
| C/T                            | 0                                             | 2        | 12      | 20      | 7       | 12        | 2         | 11   | 4             | 256           | 34                                                   | 32        |
| FDC                            | 21                                            | 10       | 15      | 8       | 10      | 2         | 0         | 0    | 1,5           | 6             | 46                                                   | 20        |
| Berechnete % für obige Tabelle |                                               |          |         |         |         |           |           |      |               |               |                                                      |           |
| Antimicrobial Agent            | % of Isolates with indicated MIC (µg/mL)      |          |         |         |         |           |           |      | MIC50 (µg/mL) | MIC90 (µg/mL) | % of Isolates per classification category            |           |
|                                | ≤ 0.25                                        | 0.38-1.0 | 1.5-2.0 | 3.0-4.0 | 6.0-8.0 | 12.0-16.0 | 24.0-64.0 | >96  |               |               | Susceptible                                          | Resistant |
| CZA                            | 0                                             | 0        | 6,1     | 24,2    | 16,7    | 12,1      | 18,2      | 22,7 |               |               | 47                                                   | 53        |
| C/T                            | 0                                             | 3        | 18,2    | 30,3    | 10,6    | 18,2      | 3         | 16,7 |               |               | 51,5                                                 | 48,5      |
| FDC                            | 31,8                                          | 15,2     | 22,7    | 21,1    | 15,2    | 3         | 0         | 0    |               |               | 69,7                                                 | 30,3      |

103

104

105

106 **Table S4.** Distribution of susceptibility patterns to ceftazidime-avibactam (CZA), ceftolozane-tazobactam  
107 (C/T), and cefiderocol (FDC) of clinical *P. aeruginosa* isolates (n = 66).

|     | total (n=66) |      | Non-MRGN (n=18) |      | 3-MRGN (n=10) |    | 4MRGN (n=38) |      |
|-----|--------------|------|-----------------|------|---------------|----|--------------|------|
|     | n            | %    | n               | %    | n             | %  | n            | %    |
| 3xR | 14           | 21,2 | 1               | 5,6  | 1             | 10 | 12           | 31,6 |
| 1xS | 18           | 27,3 | 1               | 5,6  | 3             | 30 | 14           | 36,8 |
| 2xS | 9            | 13,6 | 2               | 11,1 | 0             | 0  | 7            | 18,4 |
| 3xS | 25           | 37,9 | 14              | 77,7 | 6             | 60 | 5            | 13,2 |

108

109 MRGN (multidrug-resistant Gram-negative bacteria) is classified according to KRINKO as unsusceptible to  
110 the lead compounds of 3 (3-MRGN) or 4 (4-MRGN) of the following antibiotic classes: acylureidopenicillins  
111 (piperacillin-tazobactam or piperacillin), third- or fourth-generation cephalosporins (ceftazidime and  
112 cefepime), fluoroquinolones (ciprofloxacin) and carbapenems (meropenem and imipenem).

113 3xR/ 3xS: proportion of isolates that were resistant (R)/ susceptible (S) to all three antibiotics tested (CZA,  
114 C/T and FDC)

115 2xS/ 1xS: proportion of isolates with susceptibility (S) to two or one of the antibiotics tested.

116



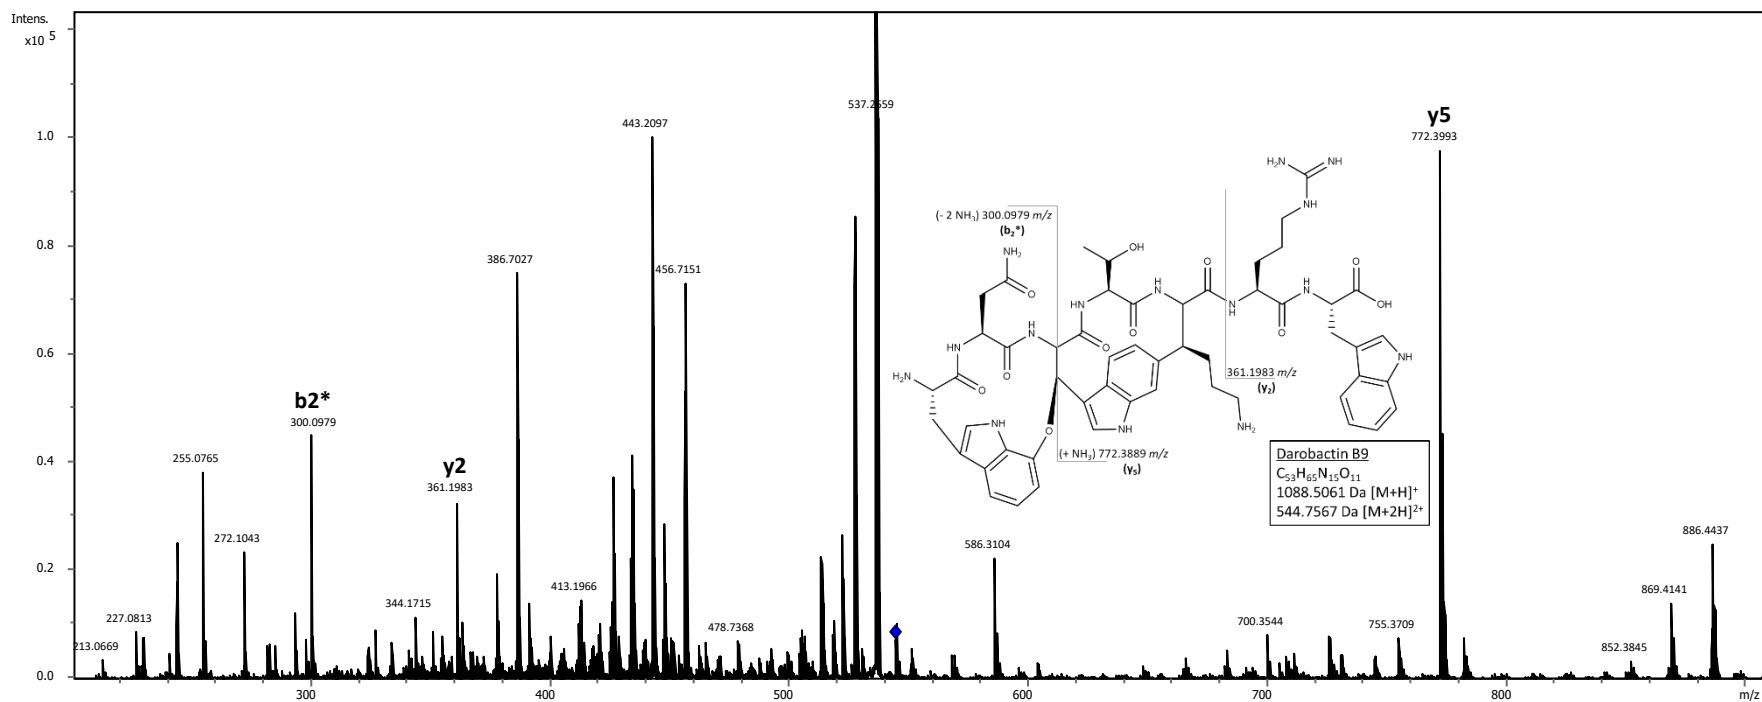

**Figure S1.** Fragmentation signature of darobactin B9. Major fragment ions observed are OH-W<sup>1</sup>N<sup>2</sup> 300.0979  $m/z$  ( $\Delta$  0.7 ppm,  $b_2^*$ ) as well as W<sup>3</sup>T<sup>4</sup>K<sup>5</sup>R<sup>6</sup>W<sup>7</sup> 772.3889 ( $\Delta$  13 ppm,  $y_5$ ) and R<sup>6</sup>W<sup>7</sup> 361.1983 ( $\Delta$  0.7 ppm,  $y_2$ ).

**Table S5:**  $^1\text{H}$  (600 MHz) and  $^{13}\text{C}$  (150 MHz) NMR data of Darobactin B9 ( $\text{D}_2\text{O}$ ;  $\delta$  in ppm) alongside correlation data from HMBC, COSY, TOCSY, and NOESY experiments. For  $^{13}\text{C}$  measurements 3-(trimethylsilyl) propionic-2,2,3,3- $\text{d}_4$  acid sodium salt (TSPA) was used as external standard. The following abbreviations are used in this table: mult.: multiplicity, int.: integral, obs.: obscured. For atom numbering, cf. Figure S 2.

| Amino acid       | Position              | $\delta_{\text{C}}$ [ppm], Type | $\delta_{\text{H}}$ [ppm] <sup>[a]</sup> , mult. (J in Hz), int. | HMBC <sup>[b]</sup> correlation to position | COSY <sup>[b]</sup> correlation to position | TOCSY <sup>[b], [c]</sup> correlation to position | NOESY <sup>[b], [c]</sup> correlation to position |
|------------------|-----------------------|---------------------------------|------------------------------------------------------------------|---------------------------------------------|---------------------------------------------|---------------------------------------------------|---------------------------------------------------|
| Trp (N-terminal) | 1                     | 59.1, CH                        | 4.03, dd (7.3, 10.9), 1H                                         | 2, (11)                                     | 2                                           | 2                                                 | 4                                                 |
|                  | 2                     | 30.7, CH <sub>2</sub>           | 3.55, dd (7.2, 13.7), 1H<br>3.307, m, 1H <sup>[d]</sup>          | 1, 3, (4), 10, 11                           | 1                                           | 1, (4)                                            | 7+9, 8                                            |
|                  | 3                     | 112.6, C <sub>q</sub>           | /                                                                |                                             |                                             |                                                   |                                                   |
|                  | 4                     | 129.1, CH                       | 7.35, s, 1H                                                      | 3, 5 and/or 10, (6)                         | /                                           | (2)                                               | 1                                                 |
|                  | 5                     | 133.5, C <sub>q</sub>           | /                                                                |                                             |                                             |                                                   |                                                   |
|                  | 6                     | 149.6, C <sub>q</sub>           | /                                                                |                                             |                                             |                                                   |                                                   |
|                  | 7 + 9                 | 118.3, CH;<br>113.5, CH         | 7.25, pseudo-t (7.8),<br>2H                                      | 5 and/or 10, 6, 7, 9                        | 8                                           | 8                                                 | 2, 17                                             |
|                  | 8                     | 124.7, CH                       | 7.19, t (7.7), 1H                                                | 6, 10                                       | 7 + 9                                       | 7 + 9                                             | 2, 17                                             |
|                  | 10                    | 133.4, C <sub>q</sub>           | /                                                                |                                             |                                             |                                                   |                                                   |
|                  | 11                    | 172.7, C <sub>q</sub>           | /                                                                |                                             |                                             |                                                   |                                                   |
|                  | Asn                   | 12                              | 55.2, CH                                                         | 3.32, m, 1H <sup>[d]</sup>                  | (11), 13, 14, (15)                          | 13                                                | 13                                                |
| 13               |                       | 43.3, CH <sub>2</sub>           | 2.16, m, 2H                                                      | 12, 14, 15                                  | 12                                          | 12                                                | /                                                 |
| 14               |                       | 178.2, C <sub>q</sub>           | /                                                                |                                             |                                             |                                                   |                                                   |
| 15               |                       | 173.0, C <sub>q</sub>           | /                                                                |                                             |                                             |                                                   |                                                   |
| Trp              | 16                    | 67.8, CH                        | 4.70, d (8.9), 1H <sup>[e]</sup>                                 | (15), 17, 26                                | 17                                          | 17                                                | /                                                 |
|                  | 17                    | 81.4, CH                        | 6.20, d (8.9), 1H                                                | 6, (16), 18, 19                             | 16                                          | 16                                                | 7+9, 8, 12, 23, 24,<br>(27)                       |
|                  | 18                    | 116.1, C <sub>q</sub>           | /                                                                |                                             |                                             |                                                   |                                                   |
|                  | 19                    | 128.9, CH                       | 7.85, s, 1H                                                      | (17), 18, 20, 25                            | /                                           | /                                                 | /                                                 |
|                  | 20                    | 141.6, C <sub>q</sub>           | /                                                                |                                             |                                             |                                                   |                                                   |
|                  | 21                    | 114.9, CH                       | 7.41, s, 1H                                                      | 32, 23 and/or 25                            | /                                           | /                                                 | 31, (32), 33, (35)                                |
|                  | 22                    | 137.4, C <sub>q</sub>           | /                                                                |                                             |                                             |                                                   |                                                   |
|                  | 23                    | 129.31, CH                      | 6.92, dd (1.0, 8.4), 1H                                          | 21, 32, 25                                  | 24                                          | 24                                                | 17, 27, 31, 32, 33,<br>(34)                       |
|                  | 24                    | 121.9, CH                       | 7.43, d (8.2), 1H                                                | (18), 20, 22                                | 23                                          | 23                                                | 17, 32, (27)                                      |
|                  | 25                    | 129.28, C <sub>q</sub>          | /                                                                |                                             |                                             |                                                   |                                                   |
| 26               | 172.6, C <sub>q</sub> | /                               |                                                                  |                                             |                                             |                                                   |                                                   |
| Thr              | 27                    | 62.6, CH                        | 3.71, d (6.5), 1H                                                | (26), 28, 29, 30                            | 28                                          | 28, 29                                            | 23, (24)                                          |
|                  | 28                    | 72.5, CH                        | 3.37, p (obs) <sup>[f]</sup> , 1H                                | (27), 29, 30                                | 27, 29                                      | 27, 29                                            | /                                                 |
|                  | 29                    | 22.7, CH <sub>3</sub>           | 0.78, d (6.4), 3H                                                | 27, 28                                      | 28                                          | 27, 28                                            | /                                                 |
|                  | 30                    | 172.4, C <sub>q</sub>           | /                                                                |                                             |                                             |                                                   |                                                   |

Table S5 (continued):

| Amino acid       | Position              | $\delta_C$ [ppm], Type | $\delta_H$ [ppm] <sup>[a]</sup> , mult. ( <i>J</i> in Hz), int. | HMBC <sup>[b]</sup> correlation to position | COSY <sup>[b]</sup> correlation to position | TOCSY <sup>[b], [c]</sup> correlation to position | NOESY <sup>[b], [c]</sup> correlation to position |
|------------------|-----------------------|------------------------|-----------------------------------------------------------------|---------------------------------------------|---------------------------------------------|---------------------------------------------------|---------------------------------------------------|
| Lys              | 31                    | 64.5, CH               | 4.08, d (10.6), 1H                                              | (22), (30), 32, 33, 36                      | 32                                          | 32, 33, 34, 35                                    | 21, 23                                            |
|                  | 32                    | 52.4, CH               | 2.94, td (3.5, 11.1), 1H                                        | /                                           | 31, 33                                      | 31, 33, 34, 35                                    | 21, 23, 24                                        |
|                  | 33                    | 30.0, CH <sub>2</sub>  | 1.79, m, 1H;<br>1.42, m, 1H <sup>[g]</sup>                      | /                                           | 32                                          | 31, 32, 34, 35                                    | 21, 23                                            |
|                  | 34                    | 29.9, CH <sub>2</sub>  | 1.73, m, 1H <sup>[h]</sup> ;<br>1.53, m, 1H                     | /                                           | 35                                          | 31, 32, 33, 35                                    | (23)                                              |
|                  | 35                    | 43.6, CH <sub>2</sub>  | 2.73, m, 2H                                                     | 33 and/or 34                                | 34                                          | 31, 32, 33, 34                                    | (21)                                              |
|                  | 36                    | 175.9, C <sub>q</sub>  | /                                                               | /                                           | /                                           | /                                                 | /                                                 |
| Arg              | 37                    | 57.8, CH               | 4.31, dd (5.9, 8.9), 1H                                         | (36), 38, (39), 42                          | 38                                          | 38, 39, 40                                        | /                                                 |
|                  | 38                    | 32.4, CH <sub>2</sub>  | 1.72, m, 1H <sup>[h]</sup> ;<br>1.58, m, 1H                     | (37), (39), (40), (42)                      | 37, 39                                      | 37, 39, 40                                        | /                                                 |
|                  | 39                    | 28.8, CH <sub>2</sub>  | 1.43, m, 2H <sup>[g]</sup>                                      | (37), (38), (40)                            | 38, 40                                      | 37, 38, 40                                        | /                                                 |
|                  | 40                    | 44.8, CH <sub>2</sub>  | 3.06, t (7.4), 2H                                               | 38, 39, 41                                  | 39                                          | 37, 38, 39                                        | /                                                 |
|                  | 41                    | 161.1, C <sub>q</sub>  | /                                                               | /                                           | /                                           | /                                                 | /                                                 |
|                  | 42                    | 177.1, C <sub>q</sub>  | /                                                               | /                                           | /                                           | /                                                 | /                                                 |
| Trp (C-terminal) | 43                    | 58.9, CH               | 4.69, t (6.2), 1H <sup>[e]</sup>                                | (42), 44, 45, 53                            | 44                                          | 44                                                | /                                                 |
|                  | 44                    | 31.3, CH <sub>2</sub>  | 3.41, dd (5.0, 14.8), 1H<br>3.314, m, 1H <sup>[d]</sup>         | 43, 45, (46), 52, 53                        | 43                                          | 43, (46)                                          | /                                                 |
|                  | 45                    | 113.9, C <sub>q</sub>  | /                                                               | /                                           | /                                           | /                                                 | /                                                 |
|                  | 46                    | 129.2, CH /            | 7.31, s, 1H                                                     | (44), 45, 47, 52                            | /                                           | (44)                                              | /                                                 |
|                  | 47                    | 140.7, C <sub>q</sub>  | /                                                               | /                                           | /                                           | /                                                 | /                                                 |
|                  | 48                    | 116.4, CH              | 7.57, d (8.2), 1H                                               | 50, 52                                      | 49                                          | 49, 50, 51                                        | /                                                 |
|                  | 49                    | 126.5, CH              | 7.29, m, 1H                                                     | 51, (47)                                    | 48, 50                                      | 48, 50, 51                                        | /                                                 |
|                  | 50                    | 123.9, CH              | 7.21, m, 1H                                                     | 48, 52                                      | 49, 51                                      | 48, 49, 51                                        | /                                                 |
|                  | 51                    | 123.1, CH              | 7.72, d (8.0), 1H                                               | 45, 47, 49, (52)                            | 50                                          | 48, 49, 50                                        | /                                                 |
| 52               | 131.7, C <sub>q</sub> | /                      | /                                                               | /                                           | /                                           | /                                                 |                                                   |
| 53               | 180.5, C <sub>q</sub> | /                      | /                                                               | /                                           | /                                           | /                                                 |                                                   |

119 [a] The <sup>1</sup>H shifts of multiplets were extracted from the HSQC spectrum (600 MHz, 150 MHz; non-uniform sampling). [b] Brackets indicate weak correlation signals.  
120 [c] TOCSY and NOESY spectra were recorded at 700 MHz with H<sub>2</sub>O suppression. [d] The observed integral for this signal was 3H due to the overlay of the proton  
121 signals for H-2, H-12, and H-44. Thus, for each of these positions an integral of 1H was assigned. [e] The observed integral for this signal was 2H due to the  
122 overlay of the proton signals for H-16 and H-43. Thus, for each of these positions an integral of 1H was assigned. [f] The pentet (p) for H-28 is partly obscured in  
123 the spectrum measured at 600 MHz (Figure S7), but can be observed in the spectrum measured at 700 MHz (Figure S11; *J* = 6.4 Hz). [g] The observed integral  
124 for this signal was 3H due to the overlay of the proton signals for H-33 and H-39. Consequently, for H-33 an integral of 1H was assigned, while for H-39 an integral  
125 of 2H was assigned. [h] The observed integral for this signal was 3H due to the overlay of the proton signals for H-34 and H-38 with an impurity. For each of these  
126 positions an integral of 1H was assigned. The observed integral for this signal was 3H due to the overlay of the proton signal for H-35 with an impurity. The  
127 expected integral for H-35 is 2H.

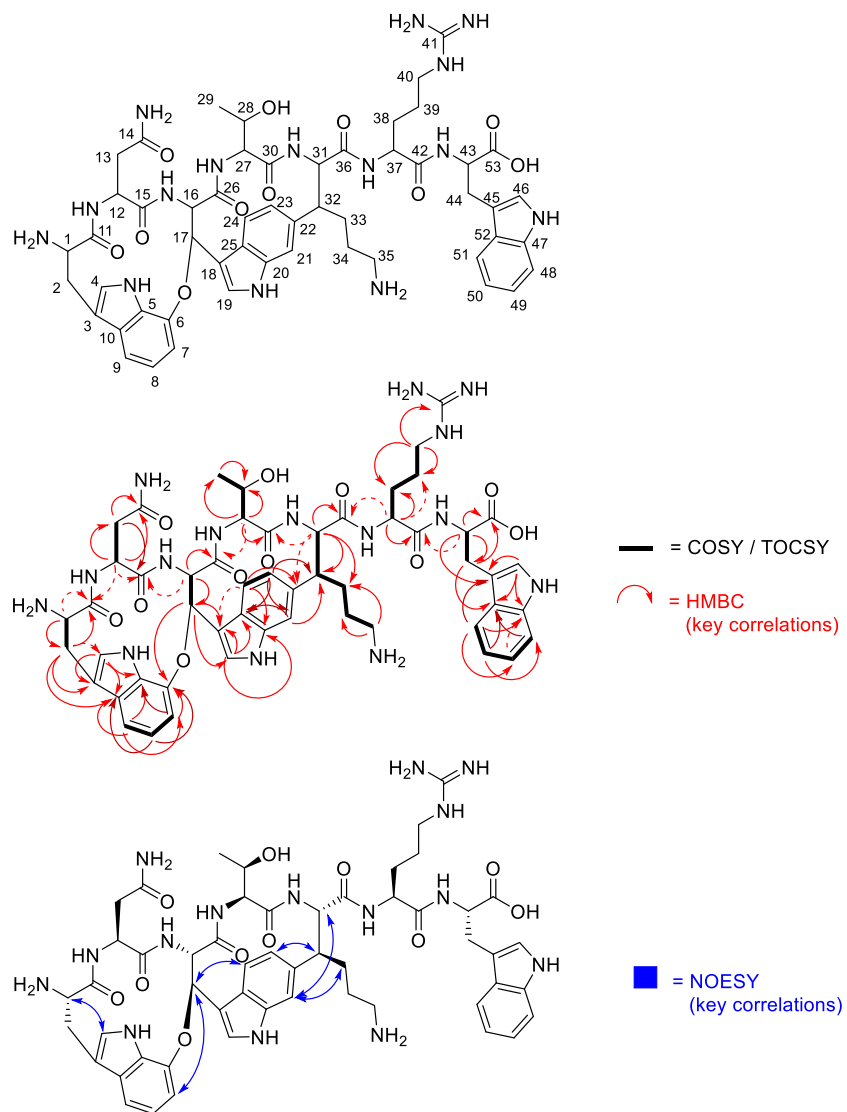

128

129 **Figure S2:** (a) Structure of darobactin B9, including the atom numbering used for NMR structure

130 elucidation. (b) COSY, TOCSY, and key HMBC correlations of darobactin B9. (Dashed arrow indicate weak

131 correlation signals.) (c) Key NOESY correlations of darobactin B9.

132

133

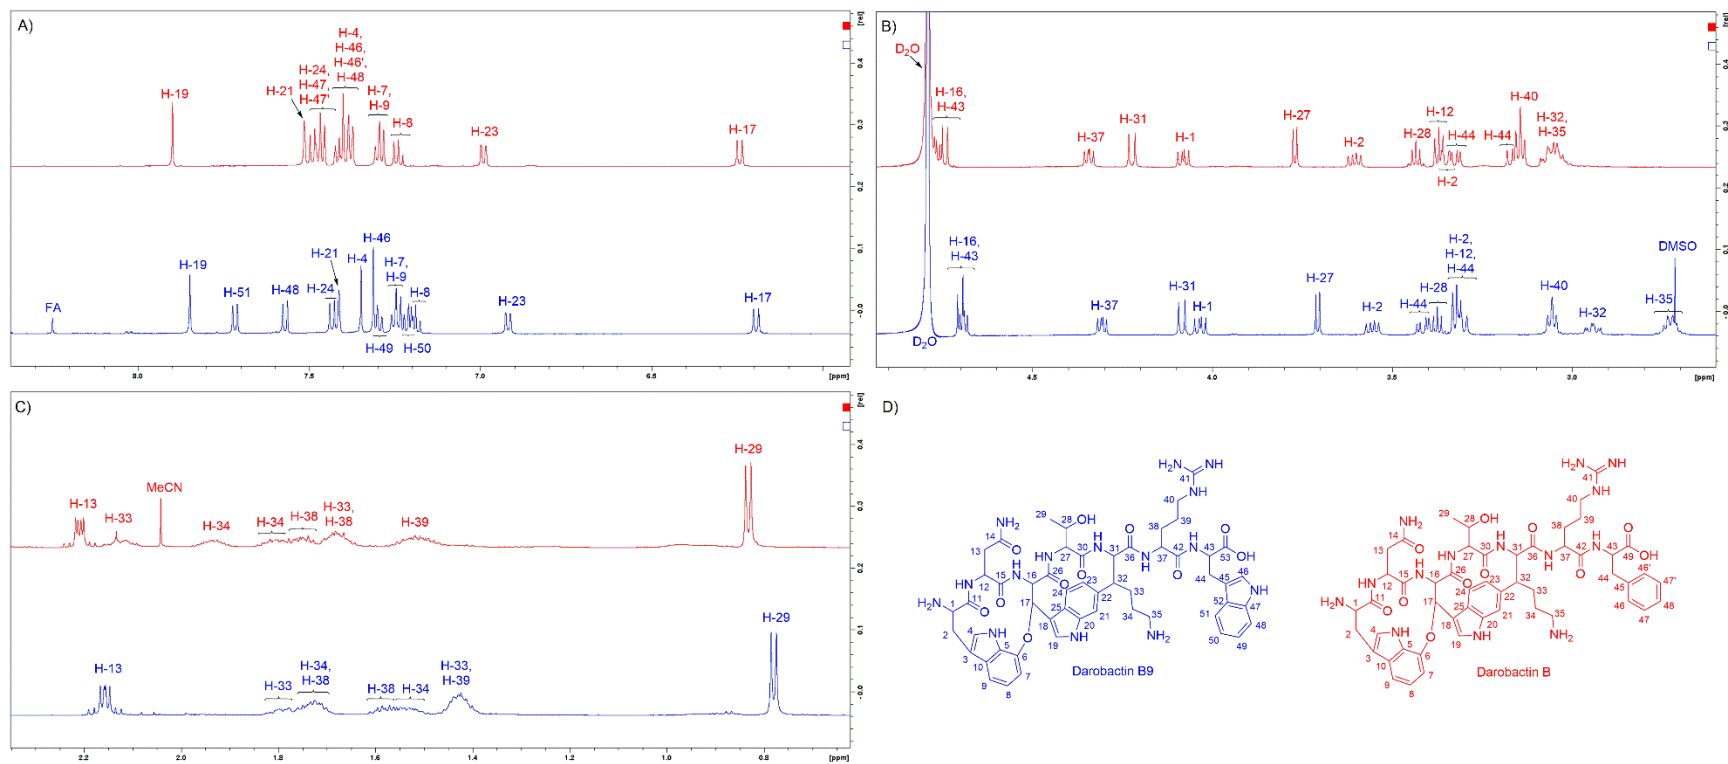134  
135136 **Figure S3:** Comparison of the <sup>1</sup>H-NMR spectra of darobactin B9 (blue) and darobactin B (red). Both spectra were measured in D<sub>2</sub>O at 600 MHz.

137

138

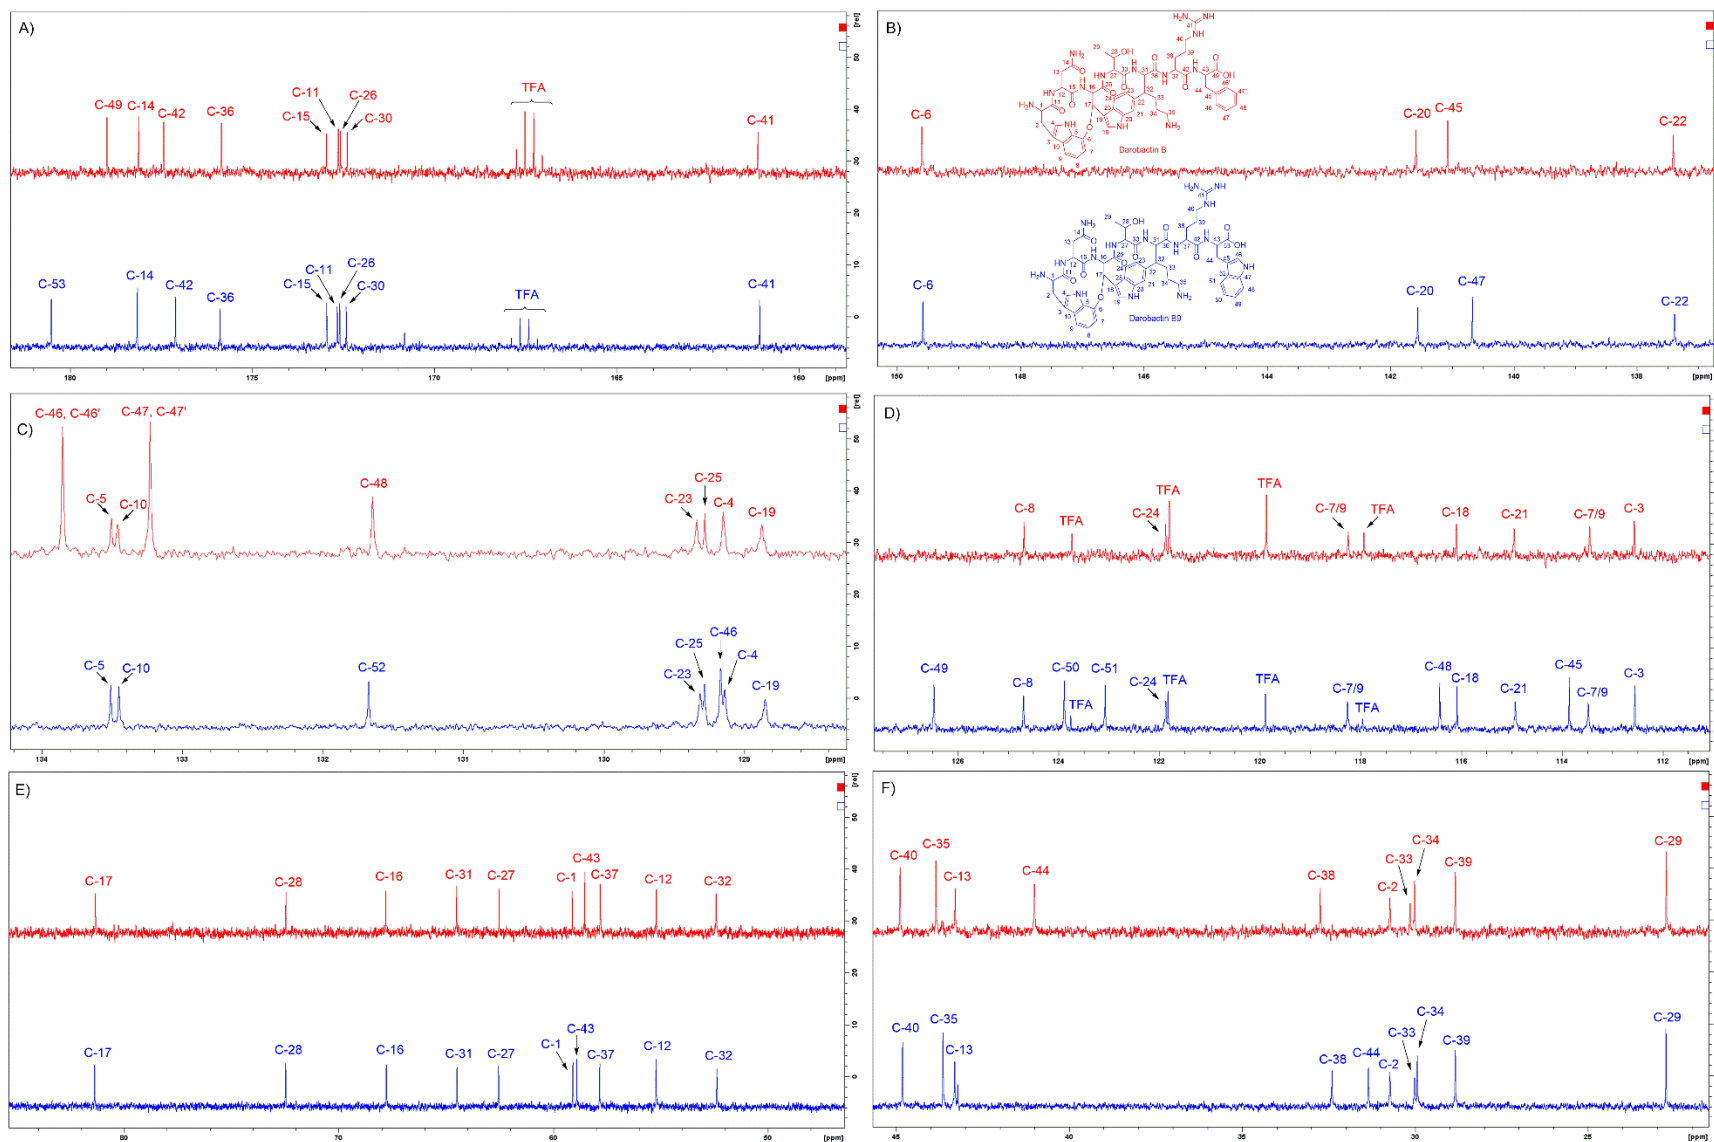

**Figure S4:** Comparison of the  $^{13}\text{C}$ -NMR spectra of darobactin B9 (blue) and darobactin B (red). Both spectra were measured in  $\text{D}_2\text{O}$  at 600 MHz. As external standard 3-(trimethylsilyl)propionic-2,2,3,3- $\text{d}_4$  acid sodium salt (TSPA) was used.

139  
140  
141  
142

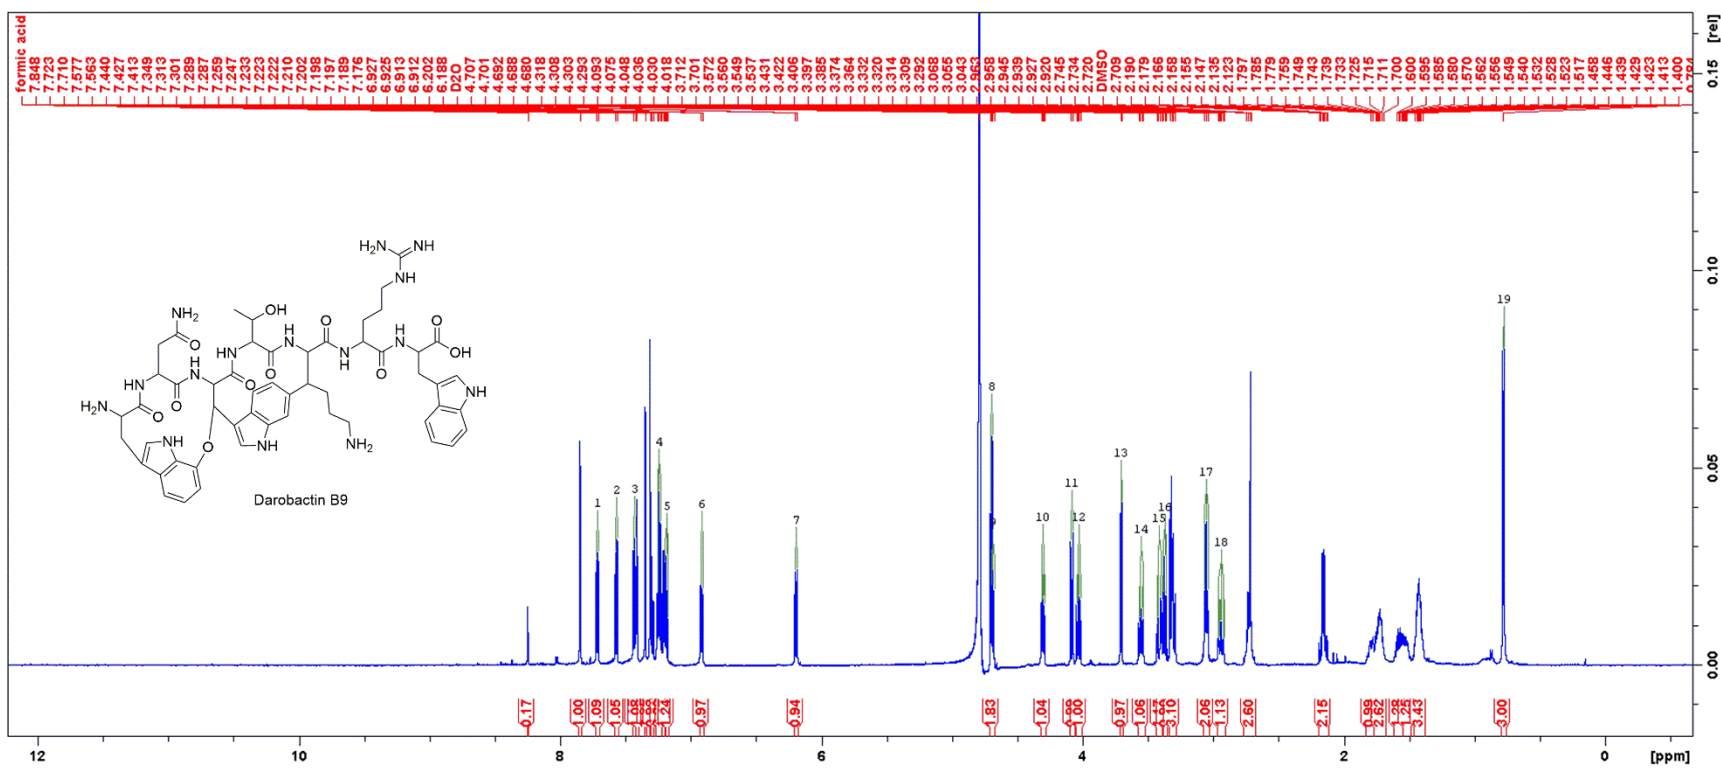

Figure S5: <sup>1</sup>H-NMR spectrum of darobactin B9 (D<sub>2</sub>O, 600 MHz).

143  
144  
145  
146  
147  
148

149  
150  
151  
152  
153  
154

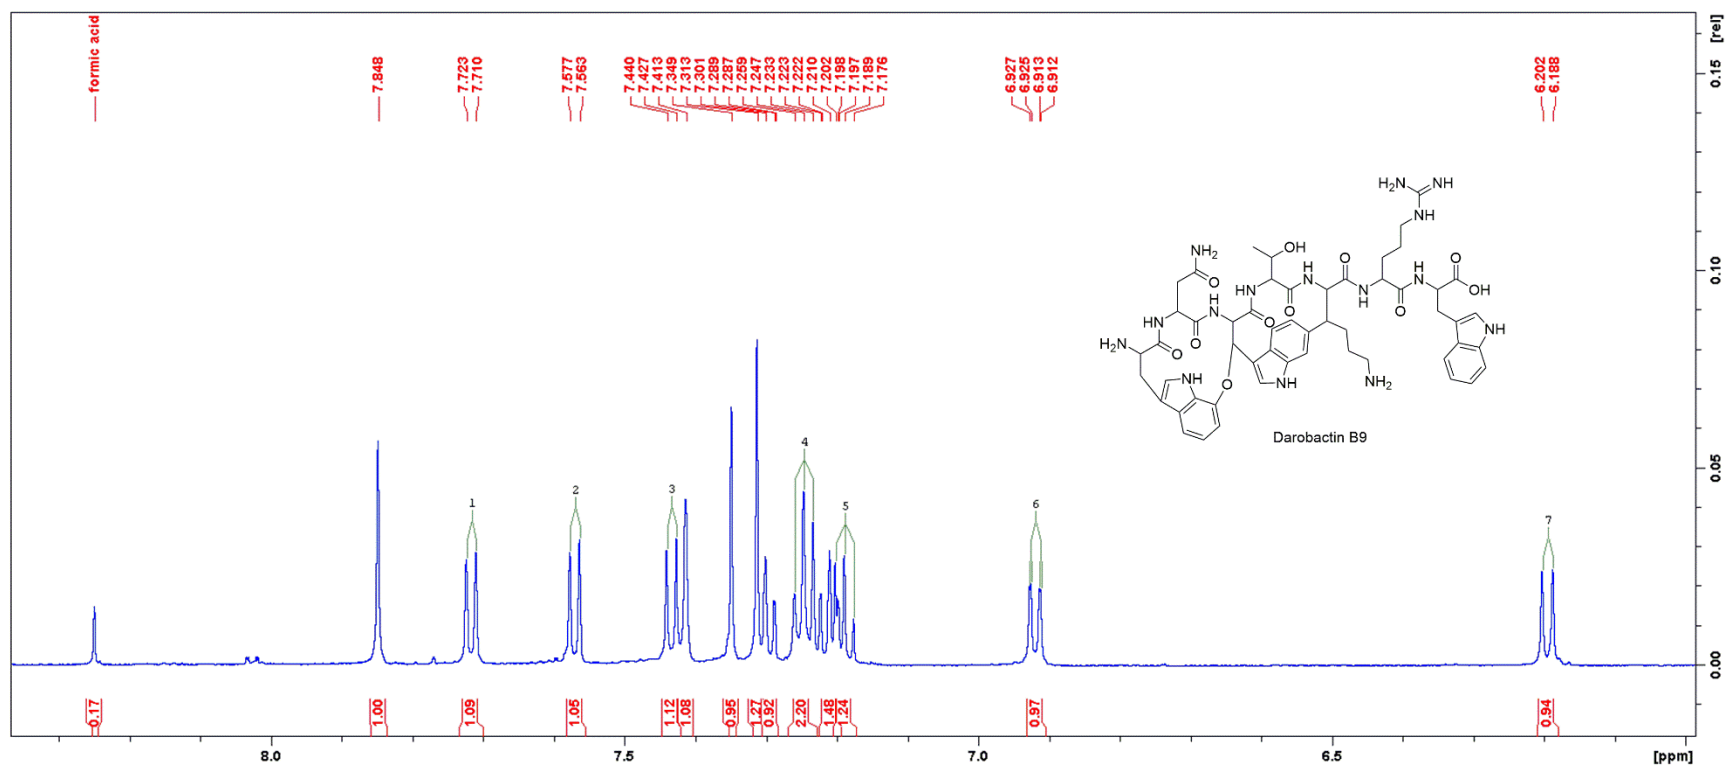

**Figure S6:**  $^1\text{H-NMR}$  spectrum of darobactin B9 ( $\text{D}_2\text{O}$ , 600 MHz). Close-up in the range of 8.30 - 6.00 ppm.



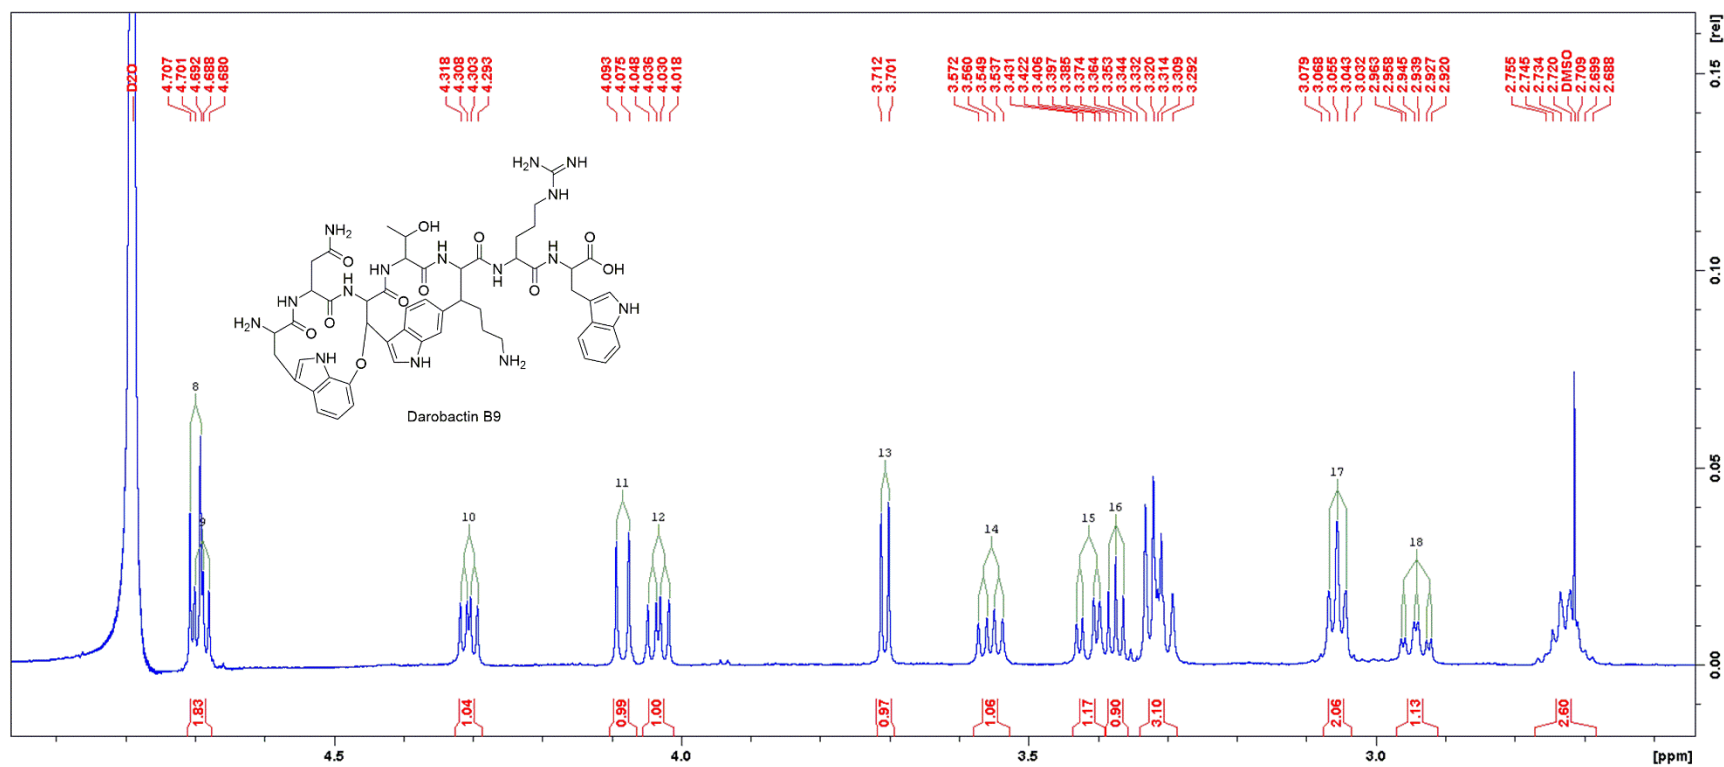

Figure S7: <sup>1</sup>H-NMR spectrum of darobactin B9 (D<sub>2</sub>O, 600 MHz). Close-up in the range of 4.90 - 2.60 ppm.

155  
156  
157  
158  
159  
160

161  
162  
163  
164  
165  
166

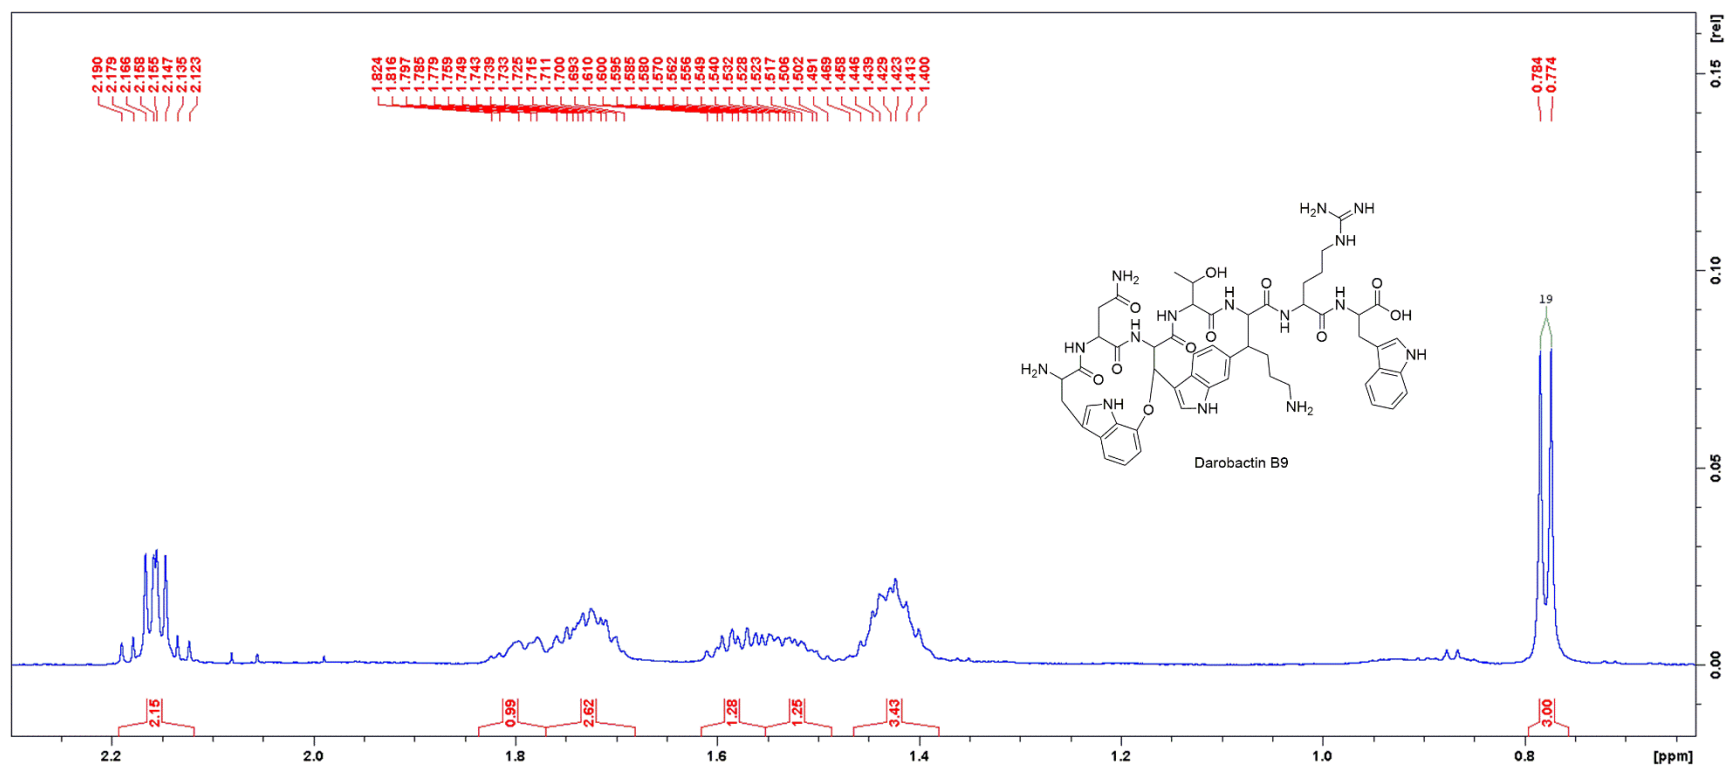

**Figure S8:** <sup>1</sup>H-NMR spectrum of darobactin B9 (D<sub>2</sub>O, 600 MHz). Close-up in the range of 2.25 – 0.65 ppm.

167  
168  
169  
170  
171  
172

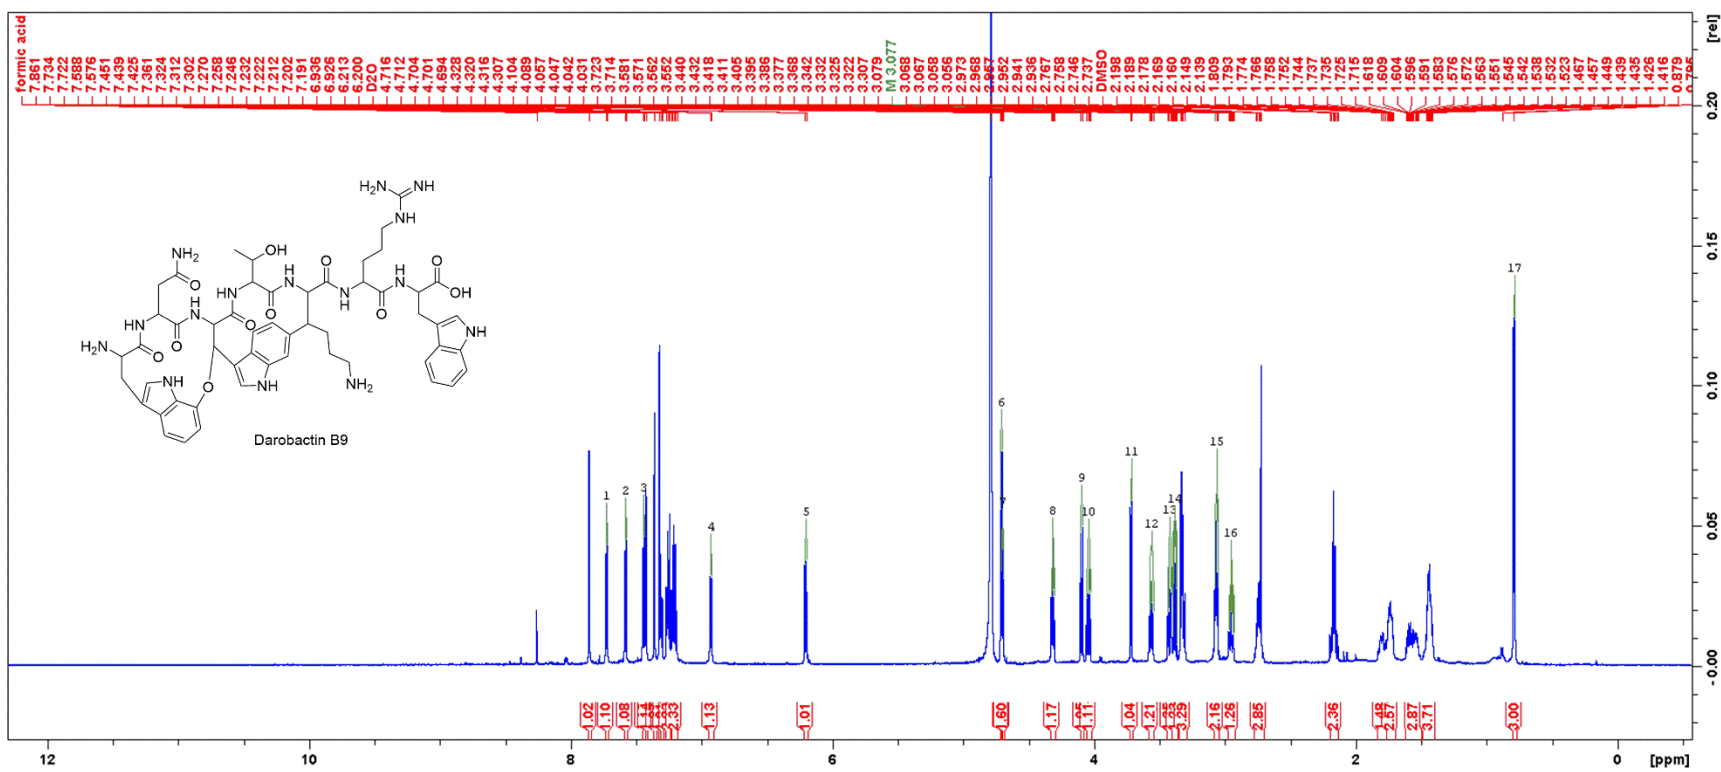

Figure S9: <sup>1</sup>H-NMR spectrum of darobactin B9 (D<sub>2</sub>O, 700 MHz).

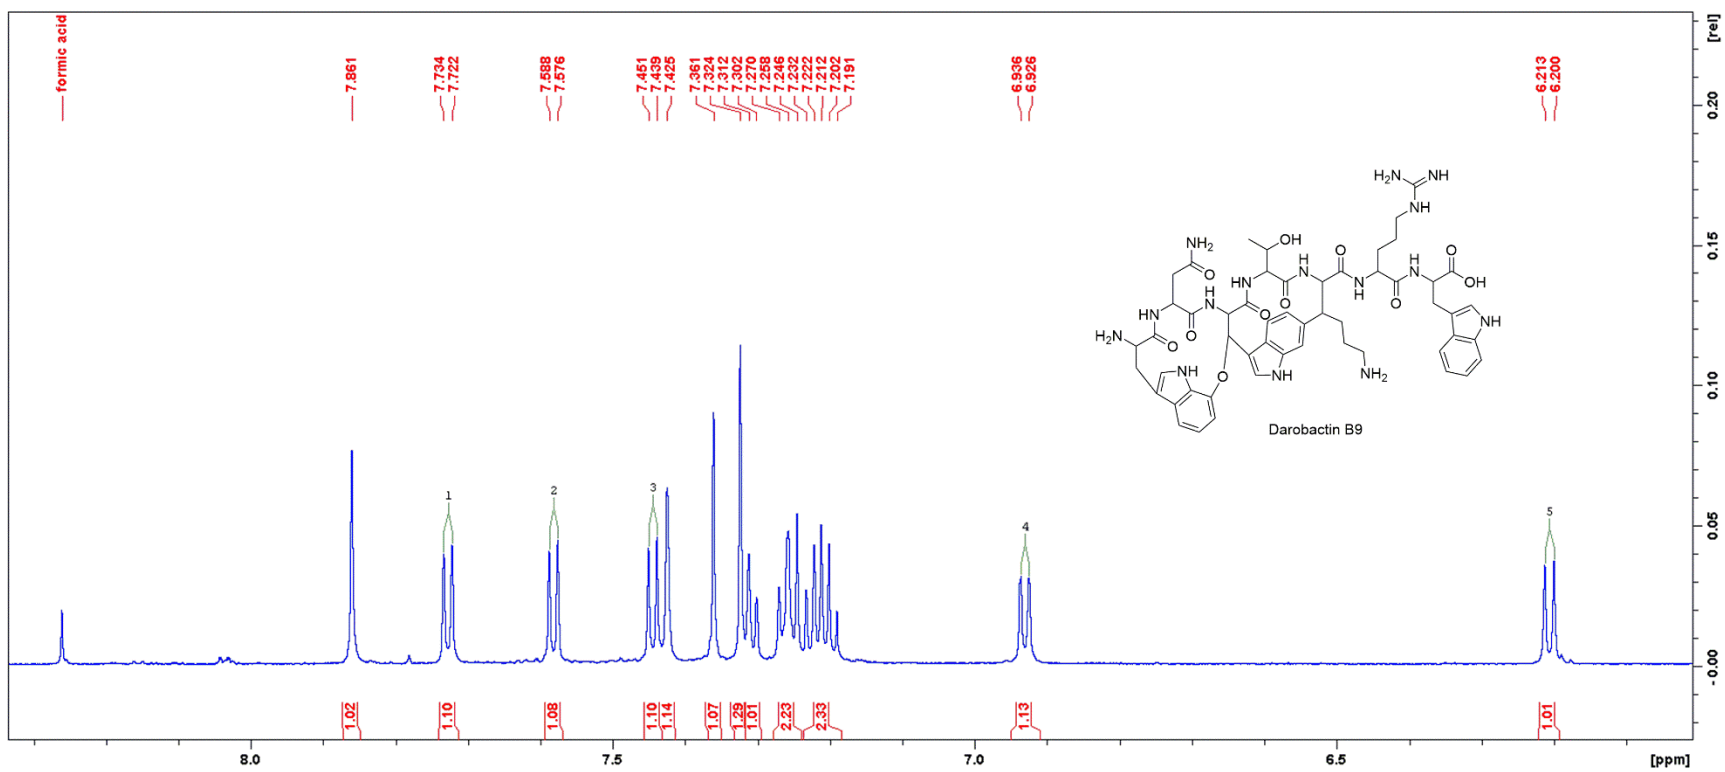

**Figure S10:**  $^1\text{H-NMR}$  spectrum of darobactin B9 ( $\text{D}_2\text{O}$ , 700 MHz). Close-up in the range of 8.30 – 6.10 ppm.

173  
174  
175  
176  
177  
178

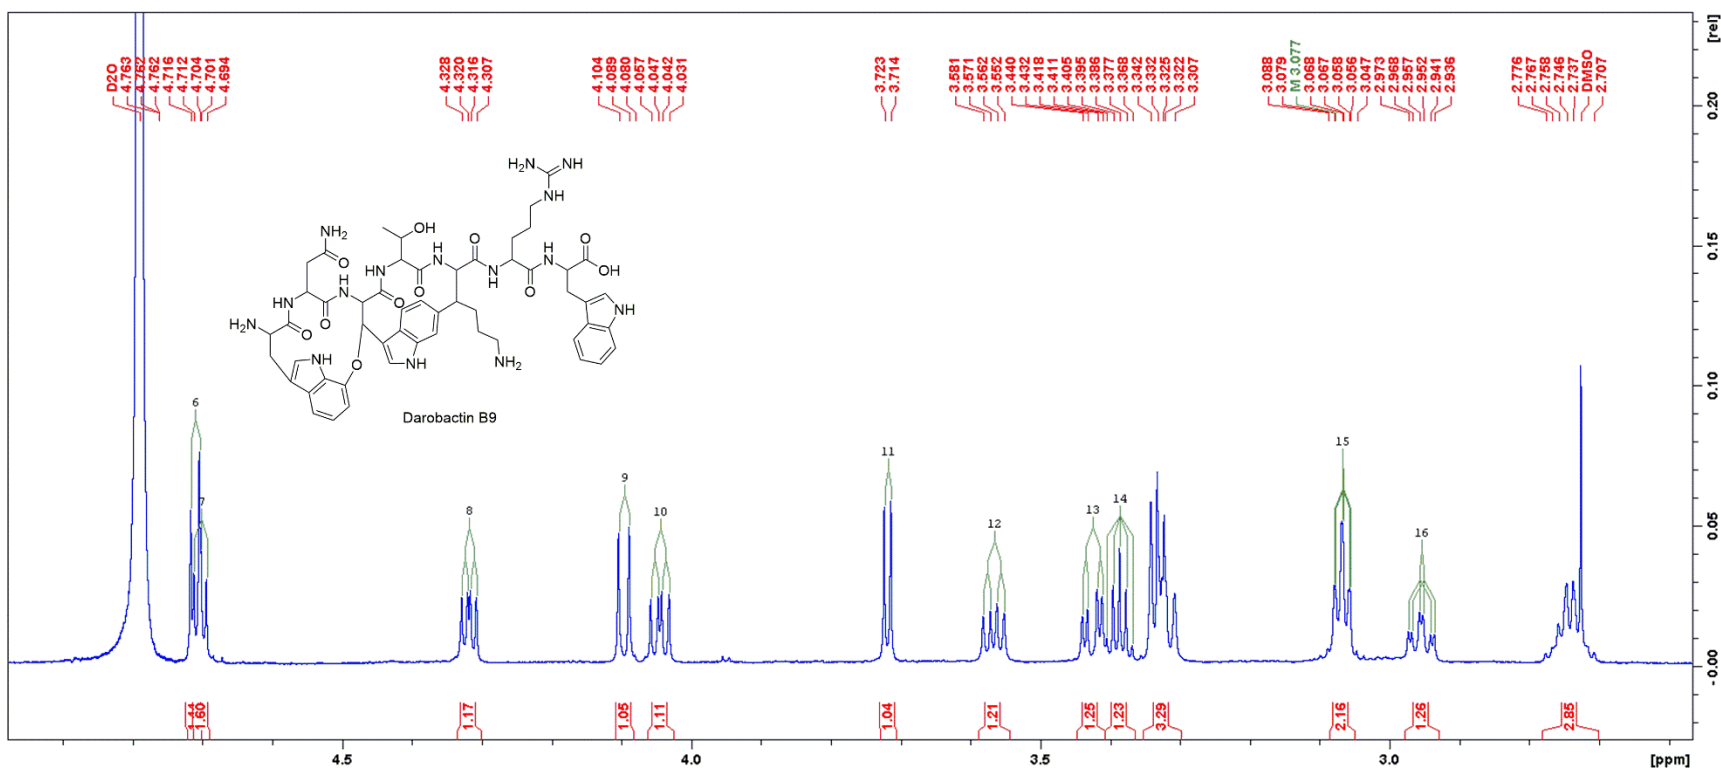

Figure S11: <sup>1</sup>H-NMR spectrum of darobactin B9 (D<sub>2</sub>O, 700 MHz). Close-up in the range of 4.90 – 2.60 ppm.

179  
180  
181  
182  
183  
184

185  
186  
187  
188  
189  
190

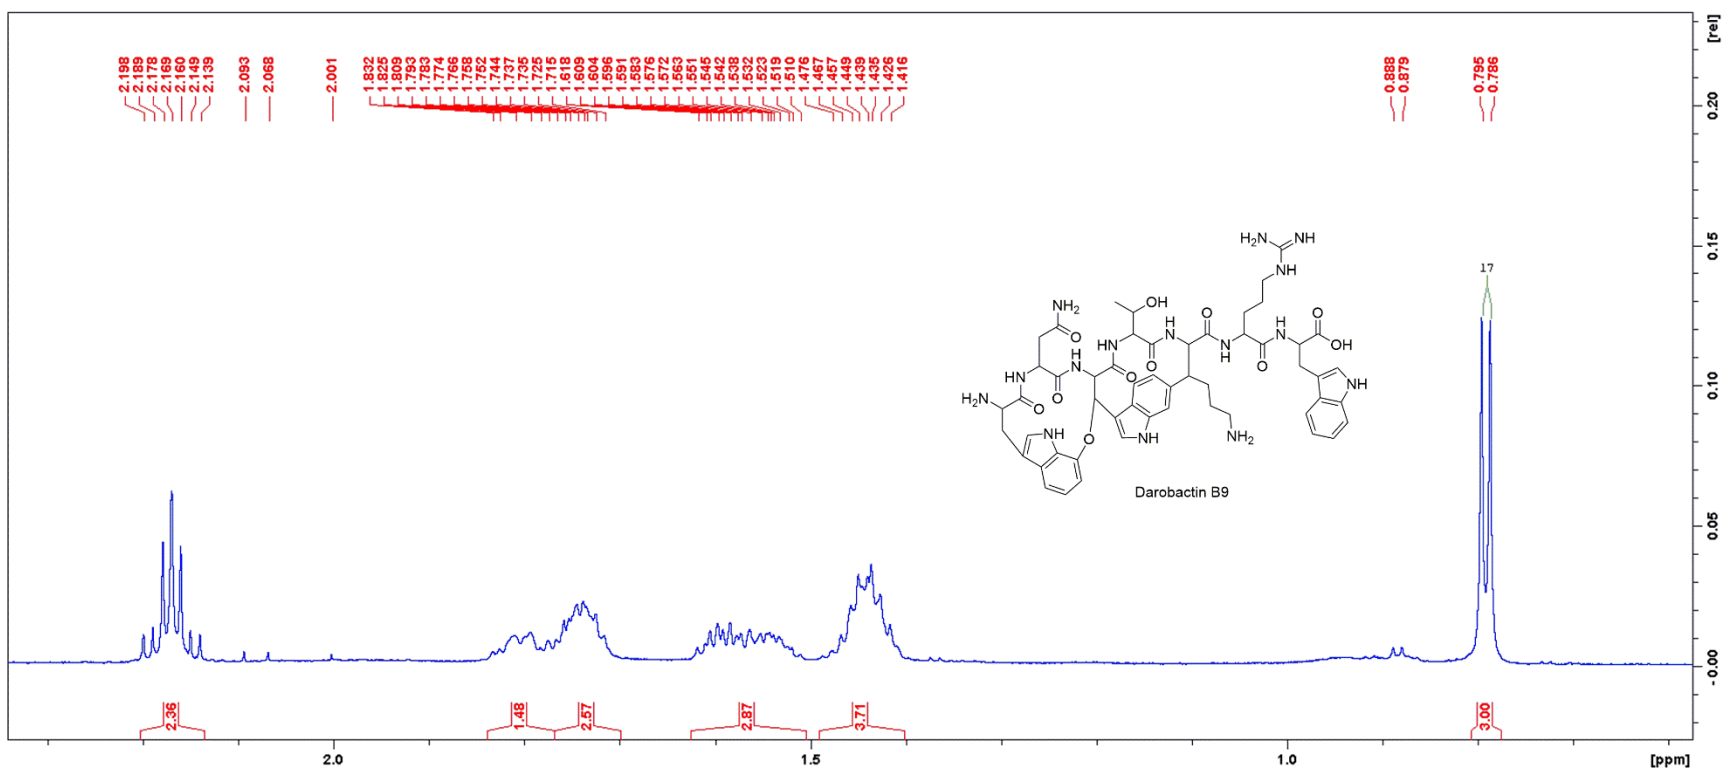

Figure S12: <sup>1</sup>H-NMR spectrum of darobactin B9 (D<sub>2</sub>O, 700 MHz). Close-up in the range of 2.30 – 0.60 ppm.

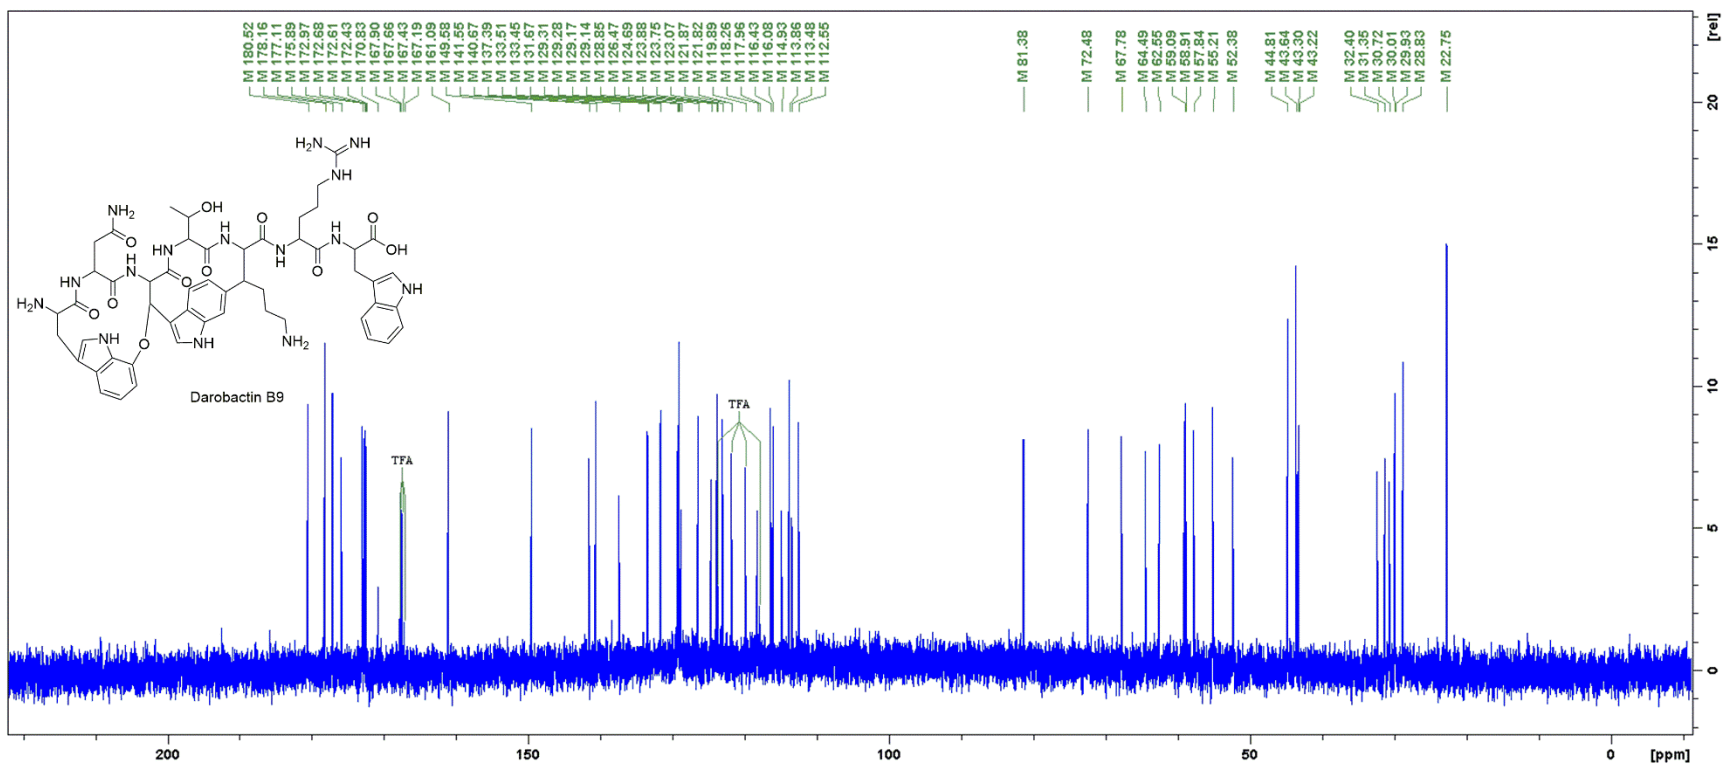

191  
192  
193  
194  
195  
196  
197

**Figure S13:** <sup>13</sup>C-NMR spectrum of darobactin B9 (D<sub>2</sub>O, 150 MHz). For the measurement 3-(trimethylsilyl)propionic-2,2,3,3-d<sub>4</sub> acid sodium salt (TSPA) was used as external standard. The multiplets indicate residual TFA.

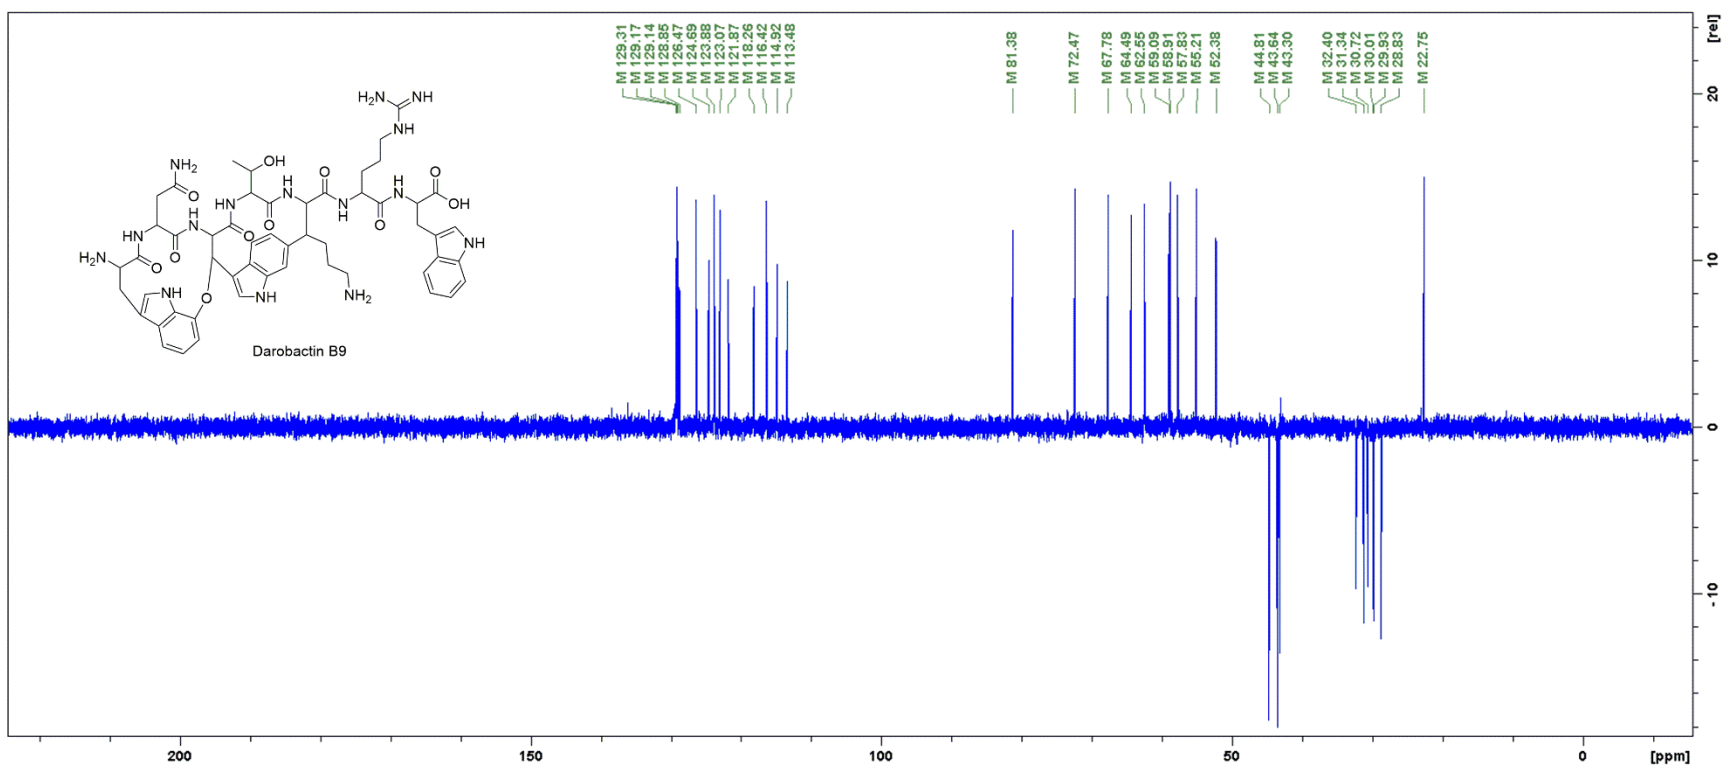

198  
199  
200  
201  
202  
203  
204

**Figure S14:** DEPT 135 spectrum of darobactin B9 (D<sub>2</sub>O, 150 MHz). For the measurement 3-(trimethylsilyl)propionic-2,2,3,3-d<sub>4</sub> acid sodium salt (TSPA) was used as external standard.



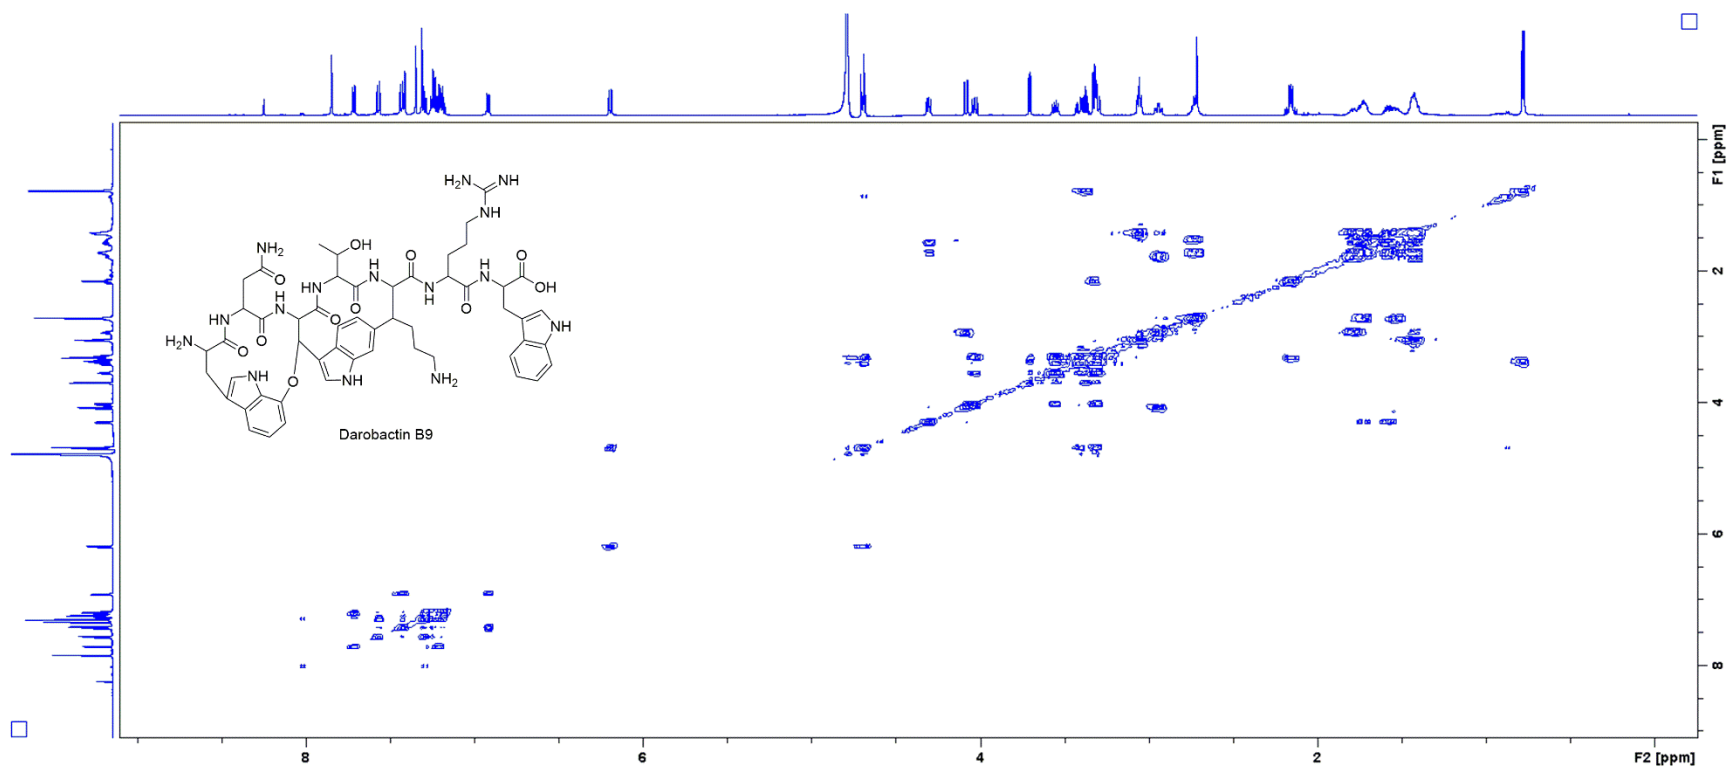

205  
206  
207  
208  
209  
210

**Figure S15:** COSY spectrum of darobactin B9 (D<sub>2</sub>O, 600 MHz).

211  
212  
213  
214  
215  
216

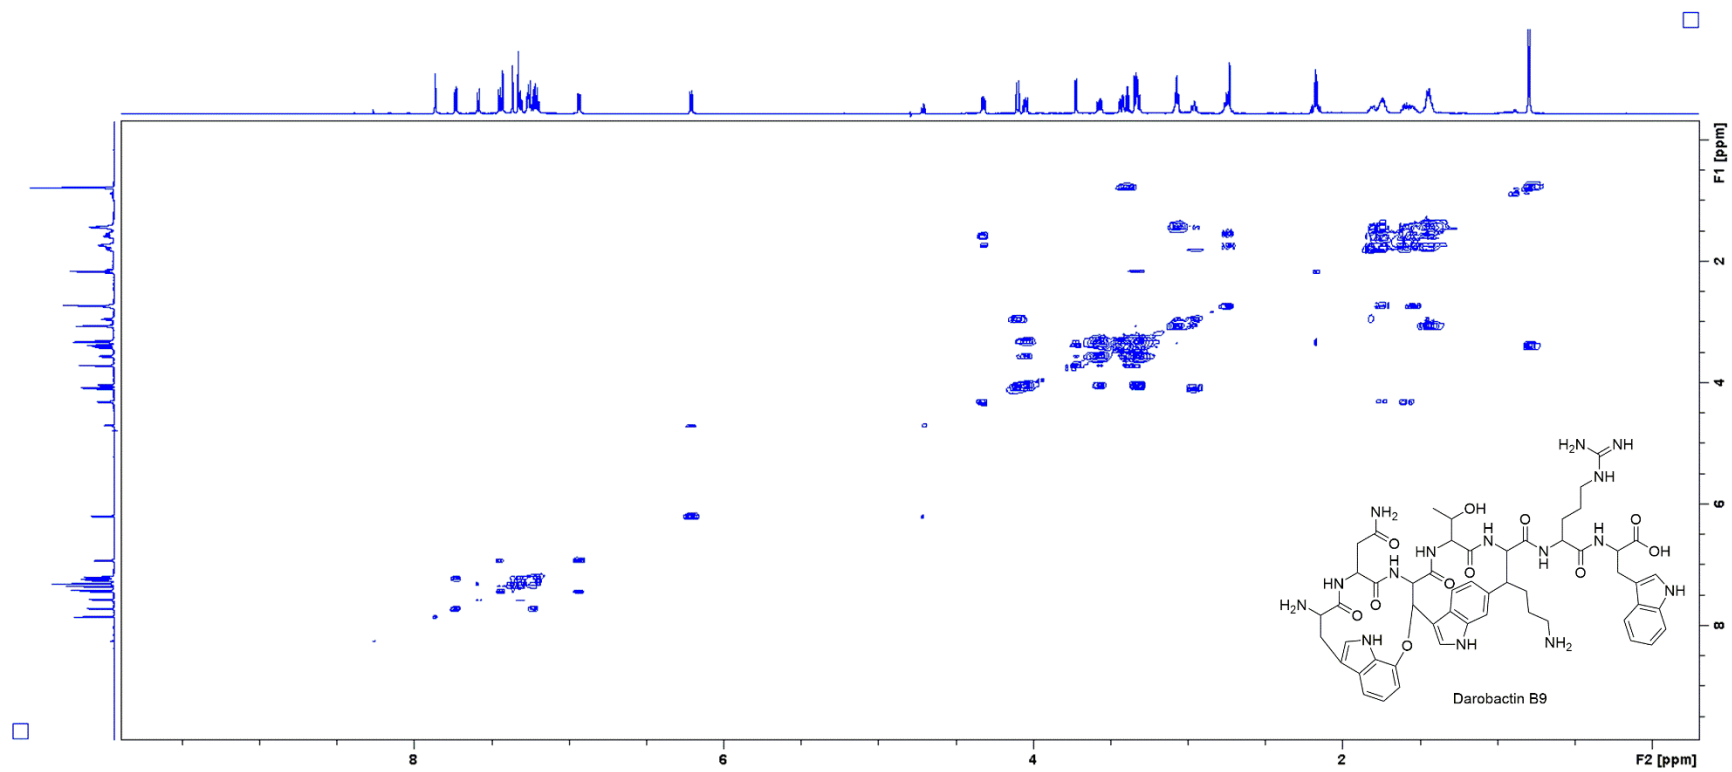

**Figure S16:** COSY spectrum of darobactin B9 (D<sub>2</sub>O, 700 MHz), measured with H<sub>2</sub>O suppression.

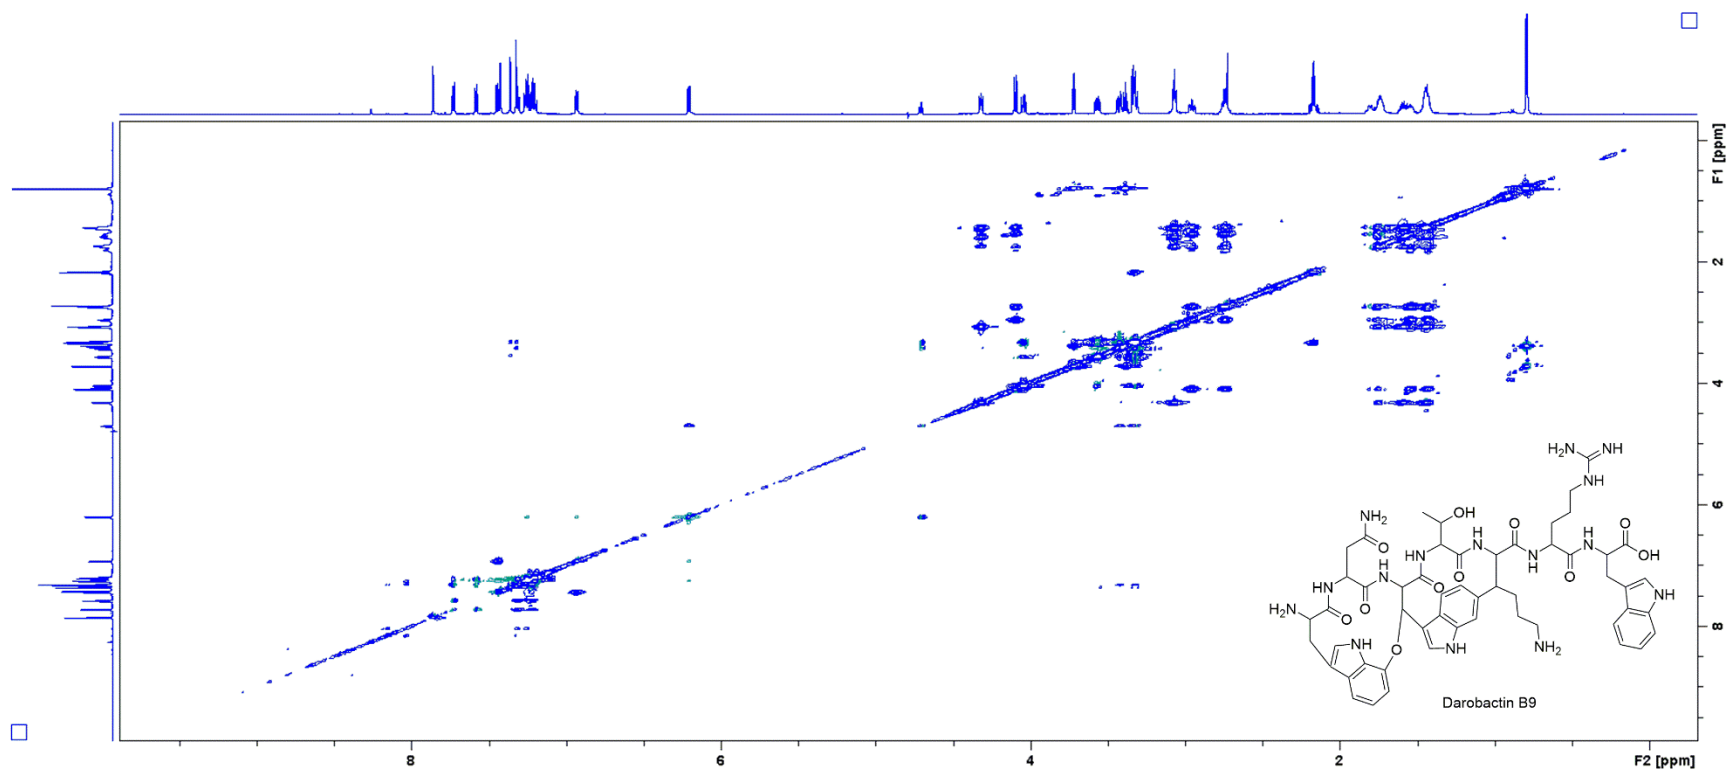

217  
218  
219  
220  
221  
222

**Figure S17:** TOCSY spectrum of darobactin B9 (D<sub>2</sub>O, 700 MHz), measured with H<sub>2</sub>O suppression.

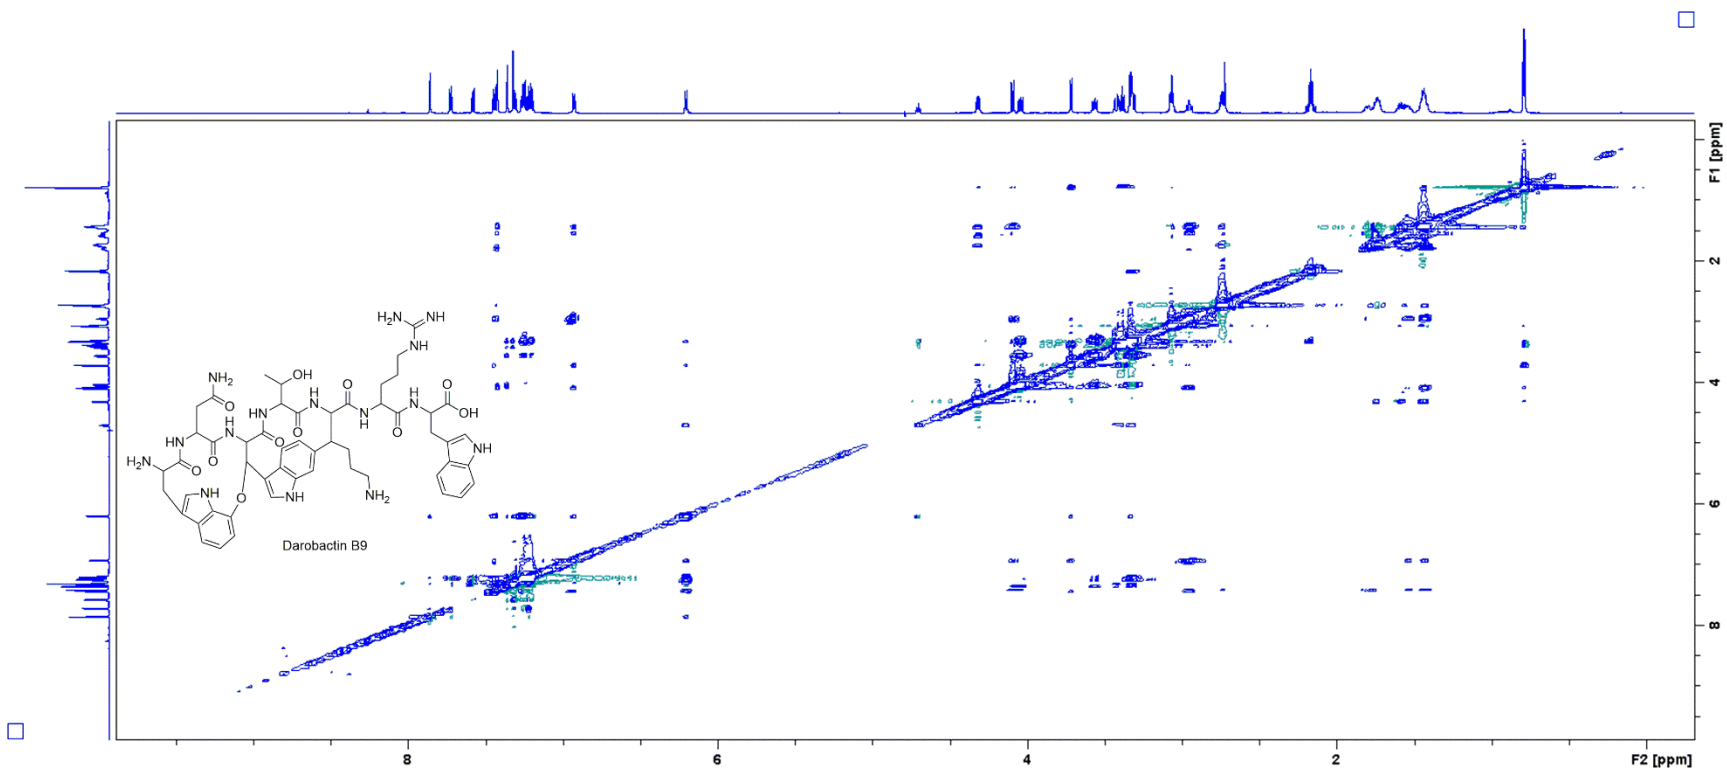

223  
 224  
 225  
 226  
 227  
 228

**Figure S18:** NOESY spectrum of darobactin B9 (D<sub>2</sub>O, 700 MHz), measured with H<sub>2</sub>O suppression.

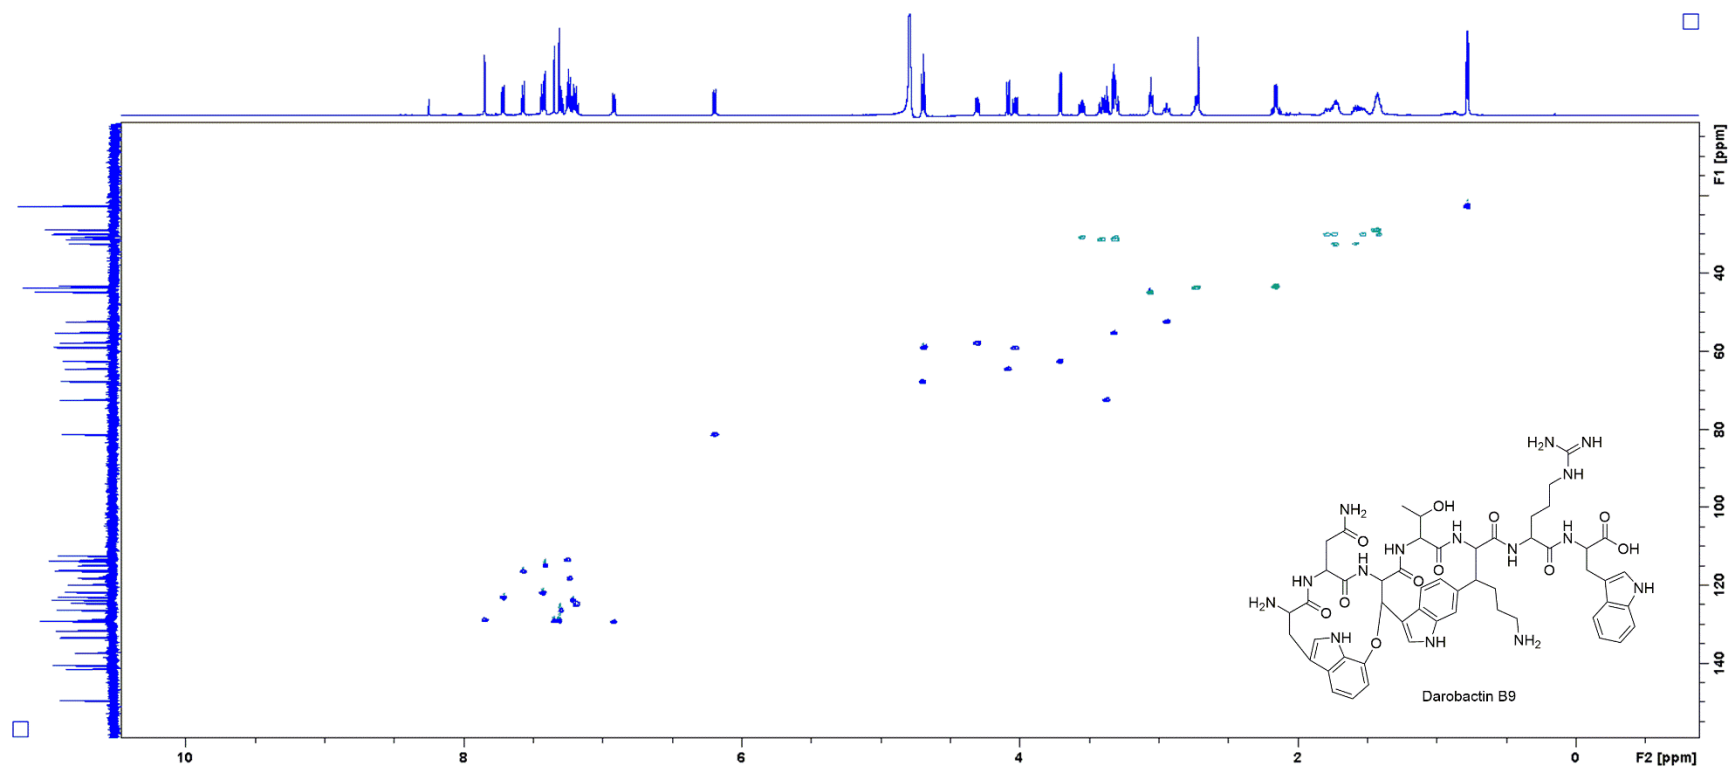

229  
230  
231  
232  
233  
234

**Figure S19:** HSQC spectrum of darobactin B9 (D<sub>2</sub>O, 600 MHz).

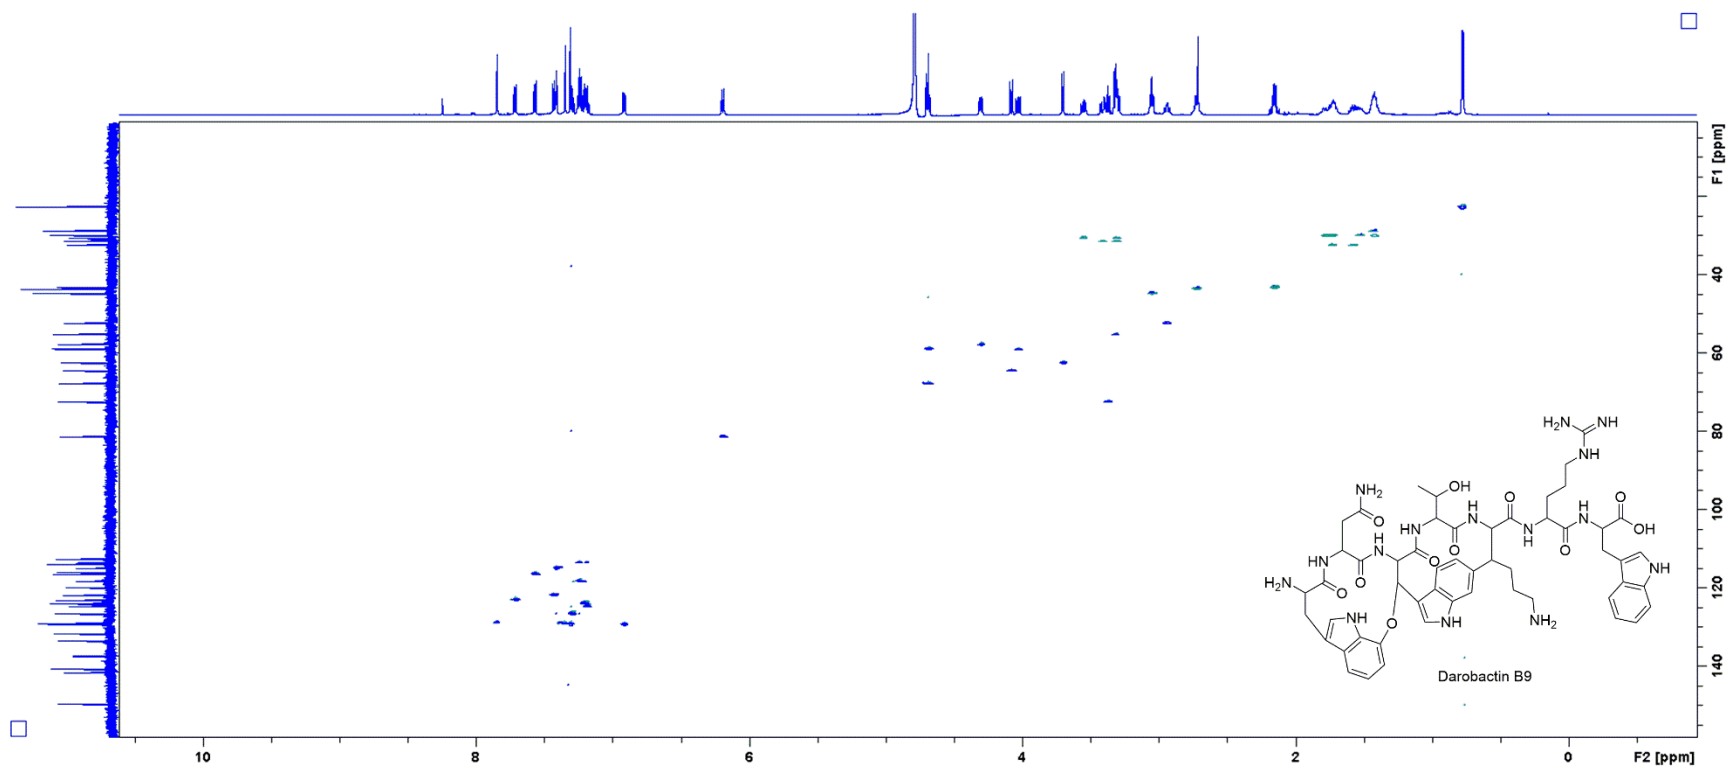

235  
236  
237  
238  
239  
240

**Figure S20:** HSQC spectrum of darobactin B9 (D<sub>2</sub>O, 600 MHz), measured with non-uniform sampling.

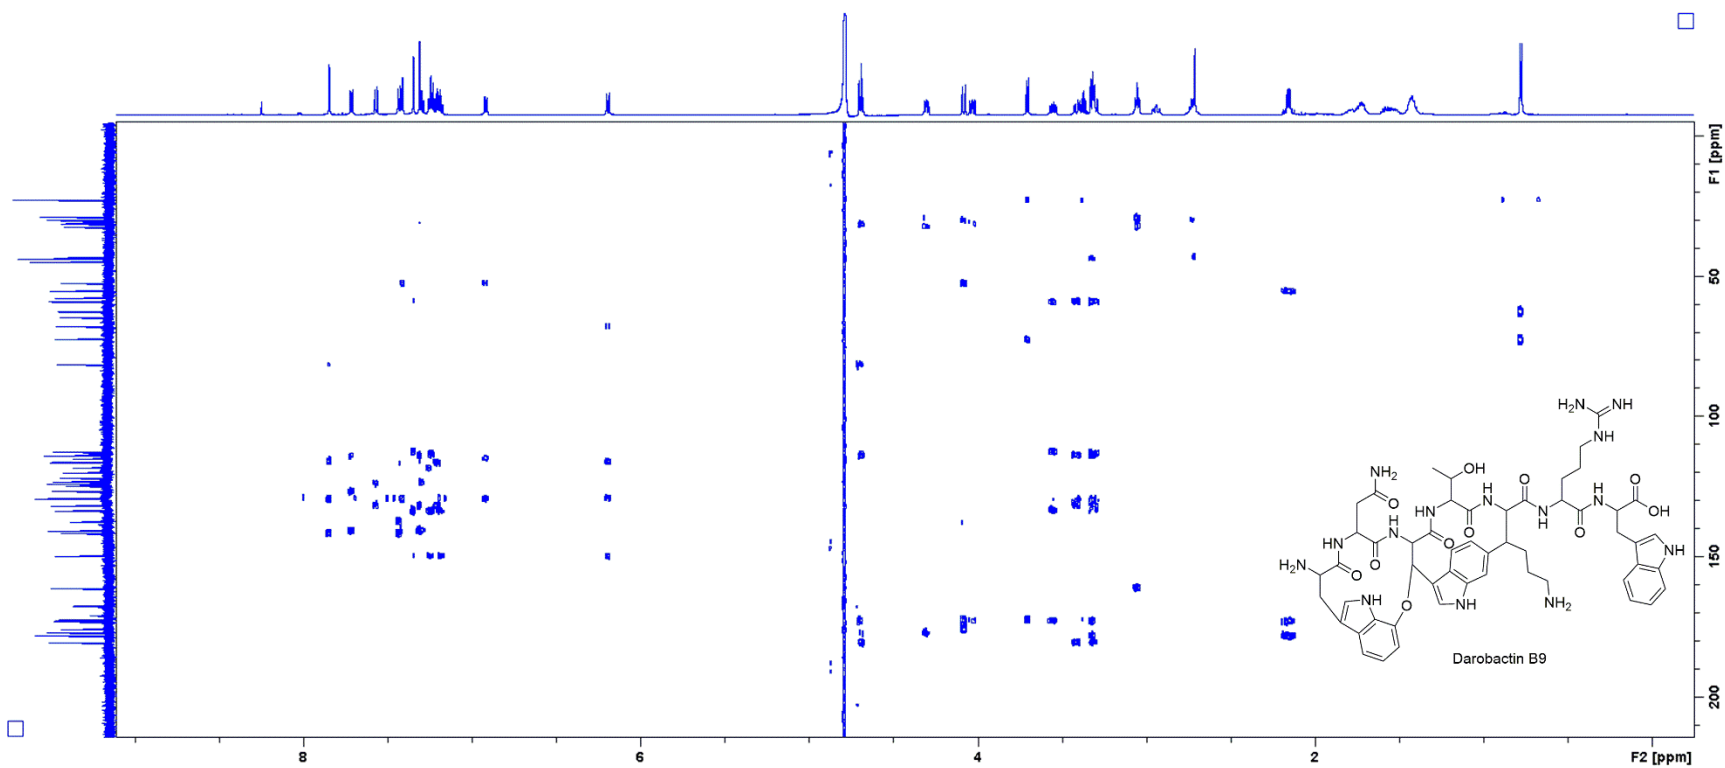

241  
 242  
 243  
 244  
 245  
 246

**Figure S21:** HMBC spectrum of darobactin B9 (D<sub>2</sub>O, 600 MHz).

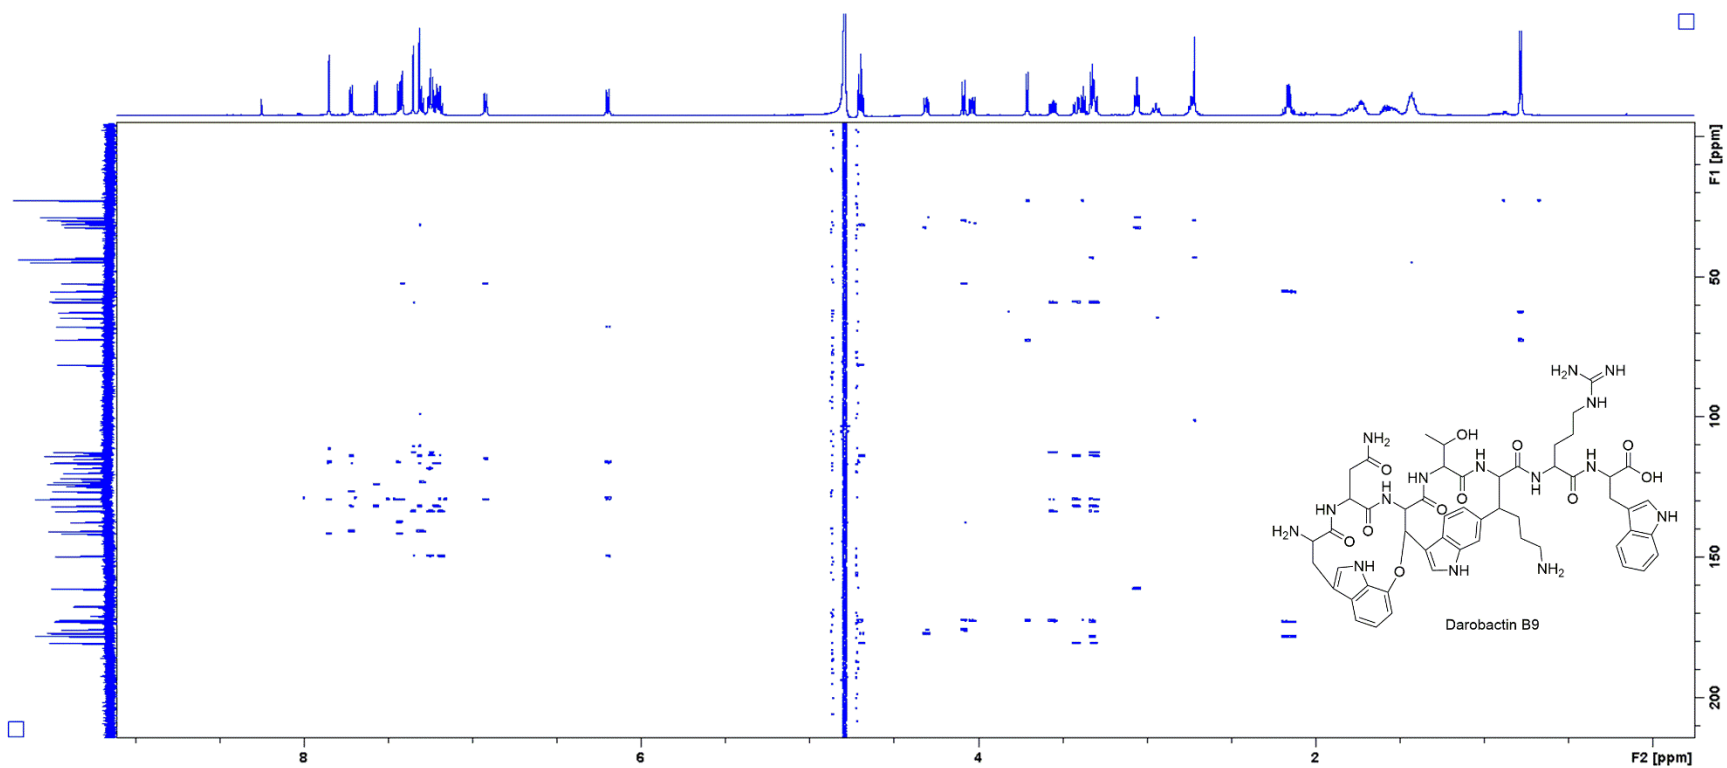

247  
248  
249  
250  
251  
252

**Figure S22:** HMBC spectrum of darobactin B9 (D<sub>2</sub>O, 600 MHz), measured with non-uniform sampling.
